# Supplementary material for: Identification of phenotype-specific networks from paired gene expression–cell shape imaging data
Source: Genome Res. 2022 Apr;32(4):750–65. doi: 10.1101/gr.276059.121 (PMC8997347; doi:10.1101/gr.276059.121)
Supplement: Supplemental Material [file supp_gr.276059.121_Supplemental_Table_S1.xlsx]

## Sheet: Supplemental_table_1
Supplemental Table S1. Table showing confidence intervals of permutation-based multiple-testing correction procedure for WGCNA module correlation.
	Rank	Module	Cell shape variable	|PCC|	P-vaue based on 1,000 perturbed samples	P-value based on 1,000 perturbed samples of the same rank in correlation matrix	1,000 |PCC| of the same rank, 95% CI
							0.025	0.975
1	1	UBE2Q1-AS1	Cell_WidthToLength	0.793184	0.000545098	0.376	0.684794	0.87789
2	2	Insulin Signaling	ruffliness	0.774166	0.000905882	0.219	0.661194	0.833796
3	3	chr16q24	NF	0.765538	0.00110784	0.121	0.641467	0.802114
4	4	chr16q24	ruffliness	0.763915	0.00115392	0.061	0.63245	0.779167
5	5	5HT2 type receptor mediated signaling	ruffliness	0.74607	0.00173137	0.078	0.620008	0.766336
6	6	Lysosome	NucbyCytoArea	0.743978	0.00180588	0.039	0.607696	0.753902
7	7	ARRDC3-AS1	Nuclear_Roundness	0.743238	0.00183627	0.034	0.604343	0.748073
8	8	Estradiol_1	Cell_WidthToLength	0.742038	0.00188039	0.018	0.600748	0.736664
9	9	Module_NA_2	Nuclear_Roundness	0.739546	0.00198922	0.01	0.592119	0.726671
10	10	Krueppel-associated box _1	Cell_WidthToLength	0.739029	0.00201961	0.005	0.584205	0.718339
11	11	MYC	Cell_WidthToLength	0.722361	0.00283039	0.012	0.584627	0.712112
12	12	ARNT KO	NucbyCytoArea	0.720689	0.00293235	0.008	0.577089	0.702704
13	13	ZRANB2-AS1	Cell_WidthToLength	0.717027	0.00316471	0.011	0.568746	0.702443
14	14	Module_NA_2	NucbyCytoArea	0.711771	0.00348039	0.01	0.564787	0.693068
15	15	MAL2-AS1	ruffliness	0.711	0.00352941	0.005	0.564866	0.695101
16	16	ECM organisation	ruffliness	0.700809	0.00423627	0.005	0.565223	0.679089
17	17	ARNT KO	CellArea	0.698103	0.00445784	0.014	0.558793	0.684258
18	18	ARRDC3-AS1	NucbyCytoArea	0.695267	0.00468235	0.006	0.554814	0.67599
19	19	5HT2 type receptor mediated signaling	NF	0.695113	0.0046951	0.005	0.546757	0.671099
20	20	CPEB2-DT	Cell_WidthToLength	0.684588	0.00569608	0.007	0.545666	0.664223
21	21	Insulin Signaling	NF	0.672857	0.00702941	0.013	0.546421	0.663781
22	22	18662380-S3-ESR1	NucbyCytoArea	0.672728	0.00704314	0.002	0.54068	0.656199
23	23	Li-Fraumeni Syndrome	NucbyCytoArea	0.671414	0.00716471	0.008	0.540634	0.659948
24	24	MAL2-AS1	NF	0.664815	0.00798725	0.006	0.534396	0.650291
25	25	ECM organisation	NucbyCytoArea	0.660517	0.00852255	0.016	0.52955	0.648003
26	26	5HT2 type receptor mediated signaling	NucbyCytoArea	0.659173	0.00871078	0.005	0.529715	0.643346
27	27	HER2 knockdown	NucbyCytoArea	0.651746	0.00989902	0.006	0.527453	0.635391
28	28	UBE2Q1-AS1	NucbyCytoArea	0.643745	0.0112873	0.017	0.519106	0.639556
29	29	HER2 knockdown	Nuclear_Roundness	0.642922	0.0114225	0.007	0.524993	0.631428
30	30	ECM organisation	CellArea	0.642896	0.0114265	0.009	0.514435	0.63218
31	31	Hedgehog 'off' state	NF	0.642776	0.0114471	0.011	0.518929	0.63201
32	32	Module_NA_2	Nuc_WidthToLength	0.639277	0.0121039	0.007	0.513112	0.625191
33	33	Krueppel-associated box_2	Cell_WidthToLength	0.637827	0.0123696	0.007	0.514058	0.626545
34	34	Module_NA_1	Cell_WidthToLength	0.6225	0.0154578	0.02	0.509441	0.618056
35	35	chr16q24	NucbyCytoArea	0.621766	0.0156402	0.02	0.502481	0.618993
36	36	Krueppel-associated box _1	NucbyCytoArea	0.618554	0.0164324	0.025	0.504377	0.618057
37	37	HER2 knockdown	Nuc_WidthToLength	0.618187	0.0165147	0.014	0.506691	0.613379
38	38	RAP1 signaling	NF	0.613631	0.0175922	0.019	0.498519	0.608301
39	39	Hedgehog 'off' state	ruffliness	0.612714	0.017802	0.018	0.496531	0.605306
40	40	H3K27ac H1 Derived MSC	Nuclear_Roundness	0.600717	0.0210618	0.045	0.494432	0.610168
41	41	CPEB2-DT	Nuclear_Roundness	0.595798	0.0224804	0.043	0.493772	0.602592
42	42	Estradiol_1	NucbyCytoArea	0.594783	0.0227912	0.053	0.493795	0.605774
43	43	ARNT KO	ruffliness	0.59355	0.0231961	0.035	0.490565	0.598553
44	44	chr7	Cell_WidthToLength	0.588134	0.0248971	0.058	0.490264	0.601337
45	45	Homology Directed Repair	NucbyCytoArea	0.587826	0.0250118	0.055	0.488589	0.598726
46	46	TNF signaling	NucbyCytoArea	0.583901	0.0263382	0.045	0.484163	0.590184
47	47	RAP1 signaling	ruffliness	0.583399	0.0265206	0.041	0.482617	0.591576
48	48	Estradiol_2	Cell_WidthToLength	0.575339	0.0292873	0.062	0.477261	0.588068
49	49	ECM organisation	NF	0.575048	0.0293873	0.064	0.474399	0.588757
50	50	chr16q24	CellArea	0.574713	0.0295127	0.059	0.482659	0.588577
51	51	Lysosome	ruffliness	0.570223	0.0312569	0.07	0.47927	0.585655
52	52	Retinol metabolism	NucbyCytoArea	0.563993	0.033652	0.088	0.47602	0.580073
53	53	H3K27ac H1 Derived MSC	Cell_WidthToLength	0.563218	0.0339745	0.085	0.471251	0.58038
54	54	UBE2Q1-AS1	CellArea	0.563188	0.0339863	0.069	0.471904	0.579537
55	55	ARNT KO	centers_distance	0.560515	0.0350657	0.08	0.468957	0.574267
56	56	Module_NA_4	Nuc_WidthToLength	0.559735	0.0354235	0.067	0.46863	0.573947
57	57	Lysosome	NF	0.559544	0.0355039	0.05	0.461303	0.56901
58	58	ARNT KO	NF	0.558796	0.0358235	0.063	0.463441	0.575651
59	59	Estradiol_2	ruffliness	0.557191	0.0364971	0.055	0.463473	0.566491
60	60	18662380-S3-ESR1	Cell_WidthToLength	0.556788	0.0366559	0.051	0.457732	0.567284
61	61	RAP1 signaling	Cell_WidthToLength	0.554364	0.0377422	0.052	0.457564	0.563429
62	62	Krueppel-associated box_2	NucbyCytoArea	0.552483	0.0385686	0.073	0.456875	0.56584
63	63	CPEB2-DT	NucbyCytoArea	0.552152	0.0387206	0.051	0.454681	0.562004
64	64	Krueppel-associated box _1	centers_distance	0.550572	0.0394196	0.048	0.454538	0.559206
65	65	Hs ETC	NucbyCytoArea	0.549956	0.0396971	0.04	0.451692	0.557241
66	66	MED4-AS1	CellArea	0.546997	0.041001	0.05	0.451867	0.553761
67	67	MED4-AS1	ruffliness	0.545461	0.0417431	0.057	0.450198	0.558329
68	68	UBE2Q1-AS1	Nuclear_Roundness	0.544658	0.0421147	0.044	0.448005	0.550975
69	69	Module_NA_3	CellArea	0.542979	0.0428667	0.047	0.444275	0.548892
70	70	Collagen Formation	Cell_WidthToLength	0.540965	0.0437961	0.048	0.444977	0.54807
71	71	MAL2-AS1	NucbyCytoArea	0.537085	0.0457647	0.065	0.443447	0.54871
72	72	RAP1 signaling	NucbyCytoArea	0.535078	0.0468216	0.063	0.442383	0.547089
73	73	VIPR1-AS1	NucbyCytoArea	0.534404	0.0471441	0.058	0.441526	0.544315
74	74	Retinol metabolism	NF	0.533827	0.0474402	0.054	0.441619	0.546207
75	75	Hs ETC	Cell_WidthToLength	0.533124	0.0477784	0.058	0.443001	0.544099
76	76	MEbrown	NucbyCytoArea	0.529352	0.0496882	0.071	0.441126	0.543512
77	77	Li-Fraumeni Syndrome	NF	0.52846	0.0501373	0.062	0.436497	0.541881
78	78	MEturquoise	ruffliness	0.523607	0.052801	0.071	0.436698	0.537507
79	79	ARRDC3-AS1	Cell_WidthToLength	0.522514	0.0534127	0.084	0.435336	0.540124
80	80	MEdarkseagreen3	Cell_WidthToLength	0.522356	0.0534922	0.068	0.434537	0.535882
81	81	MEfirebrick4	ruffliness	0.522178	0.0536098	0.059	0.431943	0.53108
82	82	MElightcyan	Nuclear_Roundness	0.521578	0.0539716	0.054	0.432117	0.529573
83	83	MEthistle	NucbyCytoArea	0.521189	0.0541735	0.057	0.427728	0.52975
84	84	MAL2-AS1	CellArea	0.520113	0.0548118	0.061	0.427505	0.530838
85	85	Estradiol_1	CellArea	0.518058	0.0559618	0.059	0.426912	0.529237
86	86	MElightcoral	CellArea	0.514508	0.058051	0.079	0.427151	0.531993
87	87	ARNT KO	Cell_WidthToLength	0.512683	0.0591314	0.072	0.426456	0.528442
88	88	MEbrown	Cell_WidthToLength	0.512682	0.0591314	0.057	0.426581	0.522234
89	89	ARRDC3-AS1	Nuc_WidthToLength	0.512381	0.0593059	0.051	0.424259	0.521015
90	90	ARRDC3-AS1	CellArea	0.511309	0.0599451	0.052	0.420578	0.519426
91	91	MEdarkolivegreen	NucbyCytoArea	0.509974	0.0607961	0.07	0.421592	0.523442
92	92	Hs ETC	centers_distance	0.50943	0.0611176	0.046	0.420844	0.519501
93	93	Krueppel-associated box _1	CellArea	0.508294	0.0618265	0.054	0.415453	0.517123
94	94	Estradiol_2	NucbyCytoArea	0.50743	0.062352	0.052	0.417313	0.516792
95	95	MEthistle	Cell_WidthToLength	0.504355	0.0642157	0.066	0.414531	0.518378
96	96	Homology Directed Repair	ruffliness	0.501866	0.0658235	0.064	0.413941	0.514062
97	97	MEturquoise	CellArea	0.50126	0.0661892	0.076	0.41275	0.518271
98	98	MEwhite	NF	0.500922	0.066398	0.056	0.410487	0.51419
99	99	VIPR1-AS1	ruffliness	0.50032	0.0668	0.064	0.410564	0.510812
100	100	MEdarkseagreen3	NucbyCytoArea	0.496898	0.0690225	0.067	0.408288	0.508399
101	101	MEmidnightblue	Nuclear_Roundness	0.496574	0.0692431	0.05	0.406826	0.506169
102	102	MEorangered4	Cell_WidthToLength	0.49501	0.0703108	0.066	0.411422	0.507708
103	103	ZRANB2-AS1	NucbyCytoArea	0.49375	0.0711667	0.078	0.406966	0.508499
104	104	Li-Fraumeni Syndrome	ruffliness	0.490627	0.0732608	0.085	0.406831	0.504575
105	105	Estradiol_2	CellArea	0.490336	0.0734431	0.07	0.404279	0.502577
106	106	5HT2 type receptor mediated signaling	CellArea	0.490044	0.0736461	0.065	0.406563	0.501875
107	107	MEsalmon4	NF	0.488695	0.0745637	0.068	0.405517	0.50129
108	108	CPEB2-DT	centers_distance	0.487438	0.0754716	0.075	0.404258	0.501862
109	109	MElightcoral	centers_distance	0.485192	0.07705	0.077	0.402472	0.500911
110	110	MEmediumpurple2	NF	0.484981	0.0772098	0.072	0.398245	0.498815
111	111	MEgreenyellow	Cell_WidthToLength	0.48342	0.0783373	0.069	0.394294	0.497953
112	112	MEmagenta4	NucbyCytoArea	0.479074	0.0814696	0.091	0.400483	0.496315
113	113	Module_NA_1	centers_distance	0.478215	0.0820833	0.088	0.394713	0.495964
114	114	Li-Fraumeni Syndrome	Cell_WidthToLength	0.477884	0.0823088	0.094	0.395723	0.49626
115	115	ZRANB2-AS1	Nuclear_Roundness	0.476273	0.0834941	0.085	0.395277	0.494645
116	116	MEsalmon4	ruffliness	0.47397	0.0852578	0.089	0.393553	0.488801
117	117	MED4-AS1	NucbyCytoArea	0.473416	0.0856676	0.078	0.393345	0.491282
118	118	MEtan	centers_distance	0.47324	0.085802	0.069	0.390621	0.484672
119	119	Krueppel-associated box_2	centers_distance	0.473214	0.0858216	0.075	0.390619	0.487231
120	120	Estradiol_1	ruffliness	0.470258	0.0881235	0.086	0.388456	0.48709
121	121	MEturquoise	NucbyCytoArea	0.470183	0.0881853	0.064	0.386183	0.483201
122	122	MEskyblue4	Cell_WidthToLength	0.469704	0.0885431	0.08	0.386745	0.487039
123	123	MEplum2	Protrusion_area	0.468069	0.0899667	0.079	0.386569	0.483347
124	124	Lysosome	Cell_WidthToLength	0.467502	0.0904118	0.075	0.386789	0.479766
125	125	Module_NA_1	NucbyCytoArea	0.466881	0.0909245	0.084	0.383256	0.48252
126	126	ZRANB2-AS1	CellArea	0.462846	0.0941706	0.092	0.382773	0.4832
127	127	Insulin Signaling	NucbyCytoArea	0.462763	0.0942255	0.083	0.380876	0.47691
128	128	Module_NA_1	CellArea	0.461022	0.0956588	0.092	0.383486	0.47728
129	129	MEred	Protrusion_area	0.459916	0.0965941	0.085	0.381253	0.472647
130	130	MEskyblue2	Nuclear_Roundness	0.459582	0.0968647	0.085	0.382373	0.472277
131	131	MEviolet	Cell_WidthToLength	0.459448	0.0969657	0.092	0.379542	0.477707
132	132	MEmagenta4	NF	0.457878	0.0983157	0.095	0.37682	0.475915
133	133	Krueppel-associated box_2	Nuclear_Roundness	0.457751	0.0984078	0.078	0.37522	0.473691
134	134	MEsalmon	NF	0.457295	0.0987696	0.07	0.371932	0.467453
135	135	MEsalmon	ruffliness	0.456621	0.0993373	0.076	0.377375	0.472045
136	136	ECM organisation	Cell_WidthToLength	0.455578	0.10022	0.085	0.375809	0.468508
137	137	TNF signaling	CellArea	0.455473	0.100295	0.081	0.370903	0.469072
138	138	H3K27ac H1 Derived MSC	NucbyCytoArea	0.454884	0.100808	0.07	0.372712	0.466621
139	139	Module_NA_3	NucbyCytoArea	0.453169	0.10231	0.082	0.373379	0.466287
140	140	MEdarkolivegreen	NF	0.450869	0.104294	0.086	0.371948	0.466118
141	141	MEbrown2	Cell_WidthToLength	0.450636	0.104513	0.071	0.37131	0.464617
142	142	MElightsteelblue	Cell_WidthToLength	0.450271	0.104844	0.074	0.368363	0.46363
143	143	MEskyblue2	Nuc_WidthToLength	0.448877	0.106105	0.079	0.368855	0.464841
144	144	MEsteelblue	NF	0.446957	0.107785	0.098	0.3687	0.462985
145	145	Module_NA_3	centers_distance	0.444478	0.110017	0.087	0.363491	0.459092
146	146	MEskyblue2	NucbyCytoArea	0.443995	0.110483	0.092	0.366704	0.461001
147	147	MEcoral1	NucbyCytoArea	0.443975	0.110493	0.066	0.366086	0.459782
148	148	Lysosome	CellArea	0.443704	0.110744	0.089	0.36303	0.459628
149	149	MEdarkseagreen4	NucleusArea	0.44342	0.110975	0.085	0.364922	0.459929
150	150	MEmediumpurple4	Nuclear_Roundness	0.443015	0.111347	0.079	0.362904	0.457096
151	151	MElightsteelblue	ruffliness	0.442388	0.111934	0.066	0.362838	0.45392
152	152	MEdarkolivegreen4	Cell_WidthToLength	0.441357	0.112889	0.091	0.362474	0.4583
153	153	Retinol metabolism	ruffliness	0.440584	0.113651	0.07	0.360236	0.452832
154	154	Collagen Formation	NF	0.439848	0.11432	0.071	0.359124	0.45509
155	155	MEdarkseagreen3	NF	0.439323	0.114798	0.067	0.356949	0.449062
156	156	Homology Directed Repair	NF	0.438287	0.11576	0.075	0.354901	0.450077
157	157	18662380-S3-ESR1	CellArea	0.437582	0.116387	0.063	0.357454	0.448017
158	158	Estradiol_2	NF	0.437134	0.116825	0.077	0.355407	0.451678
159	159	MEthistle1	Cell_WidthToLength	0.436848	0.117111	0.06	0.355642	0.446679
160	160	MEgreenyellow	NucbyCytoArea	0.436504	0.11744	0.058	0.353528	0.445401
161	161	CPEB2-DT	CellArea	0.436098	0.11786	0.063	0.35192	0.447342
162	162	Module_NA_2	Cell_WidthToLength	0.435592	0.118342	0.056	0.354648	0.448357
163	163	VIPR1-AS1	NF	0.434891	0.11898	0.056	0.354505	0.447875
164	164	MEdarkseagreen3	ruffliness	0.428354	0.125473	0.08	0.354313	0.443218
165	165	MEmediumpurple4	Nuc_WidthToLength	0.42797	0.125863	0.083	0.350702	0.441368
166	166	5HT2 type receptor mediated signaling	Cell_WidthToLength	0.427903	0.125924	0.08	0.349653	0.44003
167	167	Hs ETC	CellArea	0.427051	0.126764	0.076	0.350014	0.442923
168	168	MEmediumorchid	ruffliness	0.426273	0.127524	0.085	0.351526	0.439046
169	169	MEdarkseagreen4	NucbyCytoArea	0.425638	0.128143	0.074	0.347432	0.436275
170	170	MED4-AS1	Cell_WidthToLength	0.424729	0.129044	0.07	0.348267	0.435152
171	171	MEcoral3	Cell_WidthToLength	0.423721	0.130067	0.078	0.347218	0.439542
172	172	MElavenderblush3	Nuclear_Roundness	0.423584	0.130202	0.077	0.345873	0.435589
173	173	MEmediumpurple4	NucbyCytoArea	0.42322	0.130559	0.074	0.346723	0.435954
174	174	MEmediumpurple1	Nuc_WidthToLength	0.421709	0.132089	0.085	0.344303	0.437517
175	175	ARRDC3-AS1	centers_distance	0.421448	0.132355	0.062	0.342683	0.430918
176	176	MEsienna3	ruffliness	0.420307	0.133508	0.08	0.342162	0.435535
177	177	TNF signaling	Nuclear_Roundness	0.417895	0.135961	0.064	0.342692	0.431627
178	178	MEplum2	NucleusArea	0.412231	0.141785	0.122	0.339552	0.429562
179	179	MEcoral3	ruffliness	0.411508	0.142572	0.124	0.342835	0.43072
180	180	Module_NA_2	CellArea	0.411038	0.143084	0.101	0.341415	0.430288
181	181	Collagen Formation	CellArea	0.408558	0.145666	0.117	0.339795	0.430967
182	182	Insulin Signaling	CellArea	0.408132	0.146128	0.095	0.339343	0.426531
183	183	H3K27ac H1 Derived MSC	CellArea	0.407824	0.146478	0.105	0.337892	0.427255
184	184	Module_NA_3	ruffliness	0.407354	0.147007	0.101	0.339251	0.425472
185	185	UBE2Q1-AS1	centers_distance	0.406959	0.14746	0.12	0.337219	0.427456
186	186	TNF signaling	ruffliness	0.406903	0.147518	0.12	0.33526	0.428026
187	187	MED4-AS1	Nuclear_Roundness	0.405854	0.148665	0.104	0.334858	0.42378
188	188	Retinol metabolism	Nuc_WidthToLength	0.404623	0.150018	0.09	0.333354	0.421128
189	189	TNF signaling	Cell_WidthToLength	0.404373	0.150283	0.116	0.333719	0.422106
190	190	MElightcoral	Protrusion_area	0.404145	0.150523	0.106	0.334468	0.420494
191	191	Collagen Formation	ruffliness	0.403527	0.151225	0.11	0.333354	0.424438
192	192	MEmidnightblue	Cell_WidthToLength	0.402348	0.152575	0.096	0.332278	0.417783
193	193	MEdarkseagreen3	CellArea	0.402265	0.152662	0.101	0.333112	0.421955
194	194	18662380-S3-ESR1	NF	0.401589	0.153453	0.074	0.332555	0.417351
195	195	MEyellowgreen	NucleusArea	0.400145	0.155171	0.105	0.329632	0.416136
196	196	MEorangered1	Cell_WidthToLength	0.398799	0.156708	0.106	0.331219	0.414578
197	197	MEred	NucleusArea	0.398675	0.156868	0.093	0.328477	0.416544
198	198	18662380-S3-ESR1	centers_distance	0.398	0.15764	0.096	0.325689	0.411906
199	199	MEhoneydew	NucleusArea	0.397786	0.157882	0.085	0.326712	0.413256
200	200	MEmediumorchid	Cell_WidthToLength	0.395985	0.159996	0.105	0.327456	0.412826
201	201	Homology Directed Repair	Nuclear_Roundness	0.395717	0.16028	0.109	0.327168	0.416297
202	202	MEdarkseagreen4	Protrusion_area	0.393157	0.163302	0.11	0.326135	0.410937
203	203	MEfirebrick3	NF	0.392566	0.16402	0.091	0.323703	0.4065
204	204	CPEB2-DT	Nuc_WidthToLength	0.392232	0.164421	0.113	0.325379	0.411008
205	205	MEdarkviolet	NucbyCytoArea	0.391859	0.16488	0.096	0.324875	0.406513
206	206	MEfirebrick3	Cell_WidthToLength	0.391071	0.165856	0.104	0.322261	0.410118
207	207	MElightcyan	Protrusion_area	0.39061	0.166421	0.103	0.323516	0.406545
208	208	MEdarkred	Cell_WidthToLength	0.390173	0.166955	0.109	0.318083	0.407291
209	209	MEnavajowhite1	Cell_WidthToLength	0.389272	0.168029	0.118	0.323185	0.40747
210	210	VIPR1-AS1	Nuclear_Roundness	0.388739	0.168679	0.096	0.318206	0.406071
211	211	Li-Fraumeni Syndrome	CellArea	0.388504	0.168965	0.096	0.318389	0.403004
212	212	MEthistle	ruffliness	0.388263	0.169276	0.089	0.319339	0.40274
213	213	MEbisque4	NucbyCytoArea	0.387425	0.170325	0.097	0.318917	0.401818
214	214	MEmediumorchid	NucbyCytoArea	0.386899	0.170918	0.084	0.314933	0.402589
215	215	MEhoneydew1	ruffliness	0.386344	0.171548	0.087	0.319058	0.403265
216	216	MEsalmon2	Protrusion_area	0.385549	0.172554	0.102	0.316793	0.399998
217	217	MEthistle	NF	0.382477	0.176368	0.105	0.314088	0.400259
218	218	MEdarkviolet	Nuclear_Roundness	0.382264	0.176633	0.11	0.313619	0.398513
219	219	MEblack	Nuclear_Roundness	0.381265	0.177933	0.087	0.31276	0.397576
220	220	MEsienna4	NucbyCytoArea	0.380947	0.178358	0.09	0.315892	0.399365
221	221	Module_NA_2	centers_distance	0.380764	0.178581	0.105	0.312482	0.398266
222	222	chr7	Nuclear_Roundness	0.379676	0.179904	0.096	0.311996	0.394344
223	223	UBE2Q1-AS1	ruffliness	0.379617	0.179987	0.083	0.310442	0.394626
224	224	MEpalevioletred3	Nuc_WidthToLength	0.376726	0.183679	0.118	0.312969	0.395437
225	225	MEfirebrick3	Nuclear_Roundness	0.375713	0.184971	0.113	0.310621	0.394742
226	226	Collagen Formation	NucbyCytoArea	0.375622	0.185075	0.121	0.309194	0.391439
227	227	Retinol metabolism	CellArea	0.375558	0.185167	0.115	0.310764	0.389735
228	228	MEcoral1	ruffliness	0.375254	0.185572	0.116	0.308887	0.391484
229	229	MElavenderblush3	Cell_WidthToLength	0.374616	0.186374	0.102	0.309261	0.388937
230	230	MEpink4	NucbyCytoArea	0.374171	0.186989	0.103	0.305803	0.390798
231	231	MEbisque4	Nuc_WidthToLength	0.374148	0.187023	0.117	0.306427	0.387837
232	232	H3K27ac H1 Derived MSC	Protrusion_area	0.373972	0.187234	0.091	0.308505	0.38698
233	233	MEsalmon2	NF	0.373822	0.187434	0.086	0.30568	0.387634
234	234	MEfirebrick4	NF	0.373623	0.187693	0.102	0.304945	0.390985
235	235	Krueppel-associated box_2	Nuc_WidthToLength	0.371616	0.190292	0.106	0.305448	0.386636
236	236	MEsalmon2	NucleusArea	0.369828	0.192614	0.1	0.303819	0.384684
237	237	MEcoral3	NF	0.369647	0.192852	0.093	0.304211	0.382733
238	238	MEgrey60	NucleusArea	0.367838	0.195207	0.105	0.305143	0.386493
239	239	18662380-S3-ESR1	ruffliness	0.367778	0.195282	0.101	0.302352	0.38253
240	240	MEmagenta4	ruffliness	0.366416	0.197096	0.107	0.300667	0.380136
241	241	Homology Directed Repair	CellArea	0.365028	0.19897	0.119	0.302295	0.382096
242	242	MEdarkolivegreen	ruffliness	0.364875	0.199167	0.102	0.299278	0.383709
243	243	MEgrey60	Protrusion_area	0.364618	0.199484	0.115	0.300721	0.381038
244	244	MEpaleturquoise	CellArea	0.361125	0.204223	0.145	0.301231	0.38006
245	245	Estradiol_1	NF	0.360916	0.204502	0.112	0.298943	0.380001
246	246	TNF signaling	Nuc_WidthToLength	0.360358	0.205278	0.12	0.297493	0.379356
247	247	chr7	centers_distance	0.360293	0.205373	0.129	0.300815	0.38081
248	248	MEgrey60	Nuc_WidthToLength	0.359589	0.206363	0.123	0.295509	0.378152
249	249	MEsienna3	NF	0.359443	0.206558	0.1	0.296501	0.375608
250	250	MEorangered3	Cell_WidthToLength	0.358727	0.207502	0.123	0.298153	0.378996
251	251	MEcoral1	Nuclear_Roundness	0.357688	0.208954	0.097	0.293547	0.372446
252	252	MYC	CellArea	0.356735	0.210339	0.126	0.294247	0.375739
253	253	MEbisque4	Cell_WidthToLength	0.356227	0.211069	0.086	0.294418	0.369686
254	254	MEdarkseagreen4	NF	0.355053	0.212711	0.121	0.29391	0.37181
255	255	MEpink4	Cell_WidthToLength	0.354606	0.213388	0.107	0.290345	0.372076
256	256	MEred	NF	0.354453	0.2136	0.134	0.293213	0.370964
257	257	MEdarkslateblue	ruffliness	0.354253	0.213882	0.112	0.29251	0.372975
258	258	ZRANB2-AS1	centers_distance	0.353607	0.214801	0.104	0.291491	0.369685
259	259	Krueppel-associated box_2	CellArea	0.352733	0.216039	0.127	0.290782	0.370677
260	260	MEivory	NF	0.351583	0.217693	0.118	0.290459	0.371272
261	261	MEred	centers_distance	0.351307	0.218091	0.108	0.289863	0.368456
262	262	MEdarkviolet	ruffliness	0.34959	0.220568	0.13	0.28951	0.369856
263	263	MEpalevioletred3	Cell_WidthToLength	0.34931	0.220991	0.135	0.287208	0.369173
264	264	CPEB2-DT	Protrusion_area	0.349082	0.221293	0.121	0.288416	0.367887
265	265	MEbrown	centers_distance	0.348984	0.221447	0.124	0.286048	0.370123
266	266	MElightcoral	NucleusArea	0.348758	0.221784	0.113	0.28642	0.364324
267	267	Lysosome	Nuclear_Roundness	0.348615	0.222002	0.121	0.287429	0.366373
268	268	Module_NA_4	Nuclear_Roundness	0.348364	0.222396	0.102	0.285173	0.365345
269	269	MAL2-AS1	Cell_WidthToLength	0.347907	0.223079	0.086	0.284286	0.361154
270	270	MEplum2	Cell_WidthToLength	0.34761	0.223533	0.097	0.286729	0.360106
271	271	MElightcyan	NucleusArea	0.346933	0.22456	0.119	0.285727	0.36182
272	272	chr7	Protrusion_area	0.346291	0.225522	0.099	0.283597	0.360394
273	273	MEthistle1	NucbyCytoArea	0.345525	0.226653	0.101	0.284193	0.360431
274	274	MEskyblue2	CellArea	0.344815	0.227677	0.118	0.282807	0.360179
275	275	HER2 knockdown	centers_distance	0.344222	0.228549	0.095	0.281405	0.356519
276	276	MEmidnightblue	NucbyCytoArea	0.34359	0.229483	0.099	0.282865	0.360992
277	277	MEthistle1	Nuc_WidthToLength	0.343048	0.230261	0.098	0.282814	0.358075
278	278	HER2 knockdown	CellArea	0.34302	0.230298	0.094	0.279631	0.358026
279	279	MEwhite	ruffliness	0.342813	0.230604	0.088	0.281169	0.35575
280	280	MEpink4	NF	0.342658	0.23084	0.096	0.279112	0.354306
281	281	MEcoral1	Nuc_WidthToLength	0.341962	0.231884	0.093	0.279025	0.352658
282	282	MEhoneydew	Protrusion_area	0.341099	0.23312	0.104	0.276201	0.354857
283	283	MEyellowgreen	Nuc_WidthToLength	0.340964	0.233341	0.083	0.275335	0.353844
284	284	Estradiol_1	Nuclear_Roundness	0.340731	0.233704	0.079	0.277941	0.355319
285	285	Estradiol_2	Nuclear_Roundness	0.340375	0.234198	0.075	0.278274	0.353003
286	286	Estradiol_1	centers_distance	0.340264	0.234383	0.066	0.276271	0.349307
287	287	VIPR1-AS1	CellArea	0.339501	0.235544	0.092	0.275421	0.353161
288	288	H3K27ac H1 Derived MSC	Nuc_WidthToLength	0.338011	0.237835	0.09	0.275193	0.349187
289	289	MEyellowgreen	Protrusion_area	0.337488	0.238625	0.075	0.277003	0.349316
290	290	MEmediumpurple1	Nuclear_Roundness	0.336835	0.239628	0.078	0.275089	0.350221
291	291	MEmidnightblue	Nuc_WidthToLength	0.33599	0.240917	0.095	0.271294	0.351232
292	292	MEdarkmagenta	Cell_WidthToLength	0.335024	0.242384	0.087	0.271892	0.349384
293	293	MElightsteelblue	centers_distance	0.334433	0.243302	0.082	0.273254	0.345543
294	294	chr7	NucbyCytoArea	0.333564	0.244645	0.082	0.270521	0.34741
295	295	MEorangered4	centers_distance	0.332231	0.246755	0.111	0.272733	0.346813
296	296	MElightcoral	Cell_WidthToLength	0.330957	0.248684	0.117	0.270651	0.347656
297	297	MEcoral1	NF	0.329284	0.251442	0.122	0.26992	0.34583
298	298	MEplum	Nuc_WidthToLength	0.328653	0.252425	0.113	0.271452	0.348389
299	299	MEdarkolivegreen4	Protrusion_area	0.327951	0.253589	0.104	0.270796	0.344042
300	300	UBE2Q1-AS1	Protrusion_area	0.326959	0.25523	0.107	0.270009	0.339816
301	301	H3K27ac H1 Derived MSC	ruffliness	0.326548	0.255932	0.106	0.268435	0.342888
302	302	MEcoral1	Cell_WidthToLength	0.32505	0.258335	0.124	0.265431	0.343533
303	303	MEdarkmagenta	NucbyCytoArea	0.324441	0.259286	0.149	0.268419	0.34268
304	304	MEplum2	Nuclear_Roundness	0.322825	0.261906	0.141	0.267141	0.343978
305	305	MEorangered4	NucbyCytoArea	0.320145	0.266305	0.158	0.264861	0.338863
306	306	MEdarkgrey	Protrusion_area	0.319473	0.267452	0.143	0.267162	0.335916
307	307	MEblack	Cell_WidthToLength	0.319285	0.267738	0.164	0.265109	0.338576
308	308	MEblack	NucbyCytoArea	0.31853	0.268931	0.179	0.263541	0.343126
309	309	MEmediumpurple1	NF	0.318268	0.269362	0.148	0.263214	0.341607
310	310	MEgreenyellow	CellArea	0.317868	0.270021	0.145	0.263338	0.337305
311	311	MEcyan	Cell_WidthToLength	0.31758	0.270514	0.137	0.261631	0.336846
312	312	MElightcyan	CellArea	0.317377	0.270873	0.144	0.262139	0.336746
313	313	MEmediumorchid	CellArea	0.317251	0.271076	0.133	0.259766	0.335375
314	314	Hedgehog 'off' state	NucbyCytoArea	0.315732	0.273582	0.14	0.2613	0.333537
315	315	MEcyan	centers_distance	0.31517	0.274509	0.145	0.260207	0.332182
316	316	MEdarkviolet	CellArea	0.313933	0.276587	0.162	0.26097	0.333926
317	317	MEgrey60	Cell_WidthToLength	0.313671	0.277048	0.162	0.26031	0.334073
318	318	MEmidnightblue	ruffliness	0.312772	0.278546	0.163	0.258408	0.333399
319	319	MEmidnightblue	CellArea	0.312723	0.278607	0.151	0.260447	0.331983
320	320	ARRDC3-AS1	ruffliness	0.312355	0.279234	0.15	0.261203	0.329476
321	321	TNF signaling	NF	0.311163	0.281218	0.155	0.259377	0.329438
322	322	MEskyblue2	ruffliness	0.31075	0.281959	0.162	0.256787	0.327148
323	323	MElightcyan	Cell_WidthToLength	0.310744	0.281976	0.141	0.255762	0.328821
324	324	18662380-S3-ESR1	Nuclear_Roundness	0.310203	0.282853	0.16	0.256337	0.332832
325	325	MEdarkmagenta	CellArea	0.309856	0.283412	0.141	0.256961	0.329042
326	326	MEbisque4	Nuclear_Roundness	0.309472	0.284043	0.167	0.25667	0.330238
327	327	MEtan	CellArea	0.308486	0.28574	0.152	0.255885	0.328283
328	328	ECM organisation	centers_distance	0.307699	0.287088	0.16	0.255806	0.32445
329	329	ZRANB2-AS1	Nuc_WidthToLength	0.307471	0.287475	0.167	0.254919	0.325413
330	330	MEmediumpurple1	ruffliness	0.307451	0.287511	0.151	0.252787	0.327891
331	331	MEwhite	NucbyCytoArea	0.306342	0.289443	0.137	0.252918	0.3245
332	332	Retinol metabolism	Nuclear_Roundness	0.306115	0.289831	0.155	0.254174	0.329465
333	333	MElavenderblush3	Protrusion_area	0.305998	0.290035	0.136	0.252356	0.320912
334	334	MEcoral3	NucbyCytoArea	0.305754	0.290489	0.134	0.25138	0.324332
335	335	MEsalmon2	ruffliness	0.305648	0.290671	0.139	0.251368	0.323179
336	336	MEgreenyellow	centers_distance	0.30537	0.291135	0.129	0.251756	0.321307
337	337	Module_NA_3	NF	0.304665	0.292369	0.123	0.2496	0.319574
338	338	MEhoneydew	NF	0.303952	0.293593	0.133	0.248827	0.323701
339	339	MElightcoral	ruffliness	0.303231	0.294775	0.138	0.248306	0.321276
340	340	Hedgehog 'off' state	CellArea	0.303005	0.295175	0.126	0.246604	0.32195
341	341	MEmediumpurple2	ruffliness	0.301587	0.297693	0.134	0.247367	0.322134
342	342	MEbrown	NF	0.301568	0.29772	0.132	0.24804	0.317588
343	343	Krueppel-associated box _1	Nuclear_Roundness	0.300888	0.298873	0.12	0.246747	0.31618
344	344	MEsalmon2	Nuclear_Roundness	0.300313	0.299879	0.129	0.245639	0.320762
345	345	Li-Fraumeni Syndrome	Nuclear_Roundness	0.300286	0.299925	0.138	0.246939	0.3187
346	346	MEhoneydew	ruffliness	0.30025	0.299996	0.11	0.245289	0.314163
347	347	ARRDC3-AS1	Protrusion_area	0.299971	0.300484	0.106	0.245124	0.316953
348	348	RAP1 signaling	CellArea	0.299796	0.300808	0.127	0.244495	0.315789
349	349	MEantiquewhite2	Cell_WidthToLength	0.29977	0.30086	0.113	0.24571	0.313621
350	350	MEdarkseagreen4	Nuc_WidthToLength	0.299593	0.30118	0.106	0.24313	0.314649
351	351	CPEB2-DT	NucleusArea	0.299589	0.301184	0.111	0.245335	0.313609
352	352	MEsalmon4	NucbyCytoArea	0.299256	0.301757	0.099	0.243476	0.312107
353	353	MEthistle1	Nuclear_Roundness	0.298536	0.303046	0.088	0.242528	0.308948
354	354	MEroyalblue	Cell_WidthToLength	0.298394	0.303301	0.099	0.243189	0.313995
355	355	MEfloralwhite	Protrusion_area	0.297706	0.304489	0.104	0.24253	0.312026
356	356	MEsalmon	NucleusArea	0.297475	0.304906	0.118	0.242041	0.318799
357	357	MEsienna3	NucbyCytoArea	0.295983	0.307458	0.115	0.240277	0.311716
358	358	chr7	CellArea	0.295642	0.308015	0.106	0.241198	0.30783
359	359	H3K27ac H1 Derived MSC	NucleusArea	0.295582	0.308101	0.109	0.241724	0.31113
360	360	MEmagenta4	Nuc_WidthToLength	0.295466	0.308287	0.104	0.239604	0.306485
361	361	MEfirebrick3	Nuc_WidthToLength	0.294829	0.309405	0.094	0.239986	0.308458
362	362	MEcoral2	Protrusion_area	0.294433	0.310093	0.103	0.240177	0.309864
363	363	MEdarkolivegreen	Cell_WidthToLength	0.293517	0.3118	0.097	0.236864	0.307183
364	364	MElightsteelblue	NF	0.292945	0.312834	0.105	0.237175	0.304304
365	365	MEdarkslateblue	NF	0.291539	0.315346	0.116	0.237955	0.303673
366	366	MEnavajowhite1	NucleusArea	0.291284	0.315775	0.101	0.237588	0.306672
367	367	MEmidnightblue	Protrusion_area	0.290219	0.317598	0.127	0.235143	0.305607
368	368	MElightcyan	NucbyCytoArea	0.289731	0.318403	0.105	0.236716	0.304385
369	369	MEmediumorchid	NF	0.289314	0.319235	0.117	0.234796	0.303433
370	370	ECM organisation	Nuclear_Roundness	0.289304	0.319254	0.104	0.235171	0.304337
371	371	MED4-AS1	NF	0.289016	0.319737	0.092	0.233835	0.301506
372	372	MEviolet	Protrusion_area	0.287333	0.322818	0.103	0.234707	0.300994
373	373	MElightyellow	Cell_WidthToLength	0.286903	0.323622	0.096	0.232104	0.298816
374	374	Hs ETC	NF	0.286657	0.324064	0.103	0.232419	0.299306
375	375	MElightyellow	ruffliness	0.285595	0.326017	0.091	0.23413	0.29542
376	376	chr16q24	Cell_WidthToLength	0.285538	0.326126	0.106	0.231246	0.301556
377	377	MEfloralwhite	NucleusArea	0.285422	0.326334	0.11	0.234639	0.298263
378	378	MEblack	Nuc_WidthToLength	0.284028	0.328939	0.11	0.231595	0.297901
379	379	MEbrown	CellArea	0.283712	0.329505	0.12	0.231662	0.300564
380	380	MEdarkred	ruffliness	0.283151	0.330558	0.105	0.22793	0.296003
381	381	MEyellowgreen	Nuclear_Roundness	0.282468	0.331804	0.111	0.23381	0.295674
382	382	MEsalmon	NucbyCytoArea	0.281608	0.333385	0.105	0.228193	0.294529
383	383	Lysosome	centers_distance	0.28129	0.333973	0.108	0.228045	0.297898
384	384	MElightcoral	NucbyCytoArea	0.281109	0.334275	0.101	0.228283	0.292143
385	385	MEdarkolivegreen4	NucleusArea	0.276808	0.342387	0.169	0.229409	0.296036
386	386	MEnavajowhite1	Nuc_WidthToLength	0.276653	0.342678	0.148	0.228649	0.295334
387	387	MEdarkolivegreen4	NF	0.274132	0.347496	0.183	0.225919	0.294958
388	388	MEmediumpurple4	CellArea	0.27411	0.34754	0.158	0.226245	0.292336
389	389	MEdarkmagenta	centers_distance	0.273976	0.347773	0.169	0.227554	0.296856
390	390	MEplum	CellArea	0.273699	0.3483	0.17	0.224764	0.292503
391	391	MElightyellow	NF	0.273051	0.349536	0.169	0.22382	0.293237
392	392	MEivory	ruffliness	0.27202	0.351454	0.158	0.224451	0.292448
393	393	MEdarkolivegreen4	centers_distance	0.271316	0.352811	0.179	0.224024	0.291602
394	394	MElightgreen	ruffliness	0.271064	0.353313	0.183	0.22386	0.288654
395	395	MEskyblue4	NucbyCytoArea	0.270054	0.355255	0.183	0.221807	0.290188
396	396	MEthistle	Nuc_WidthToLength	0.269917	0.355525	0.17	0.22322	0.287233
397	397	Li-Fraumeni Syndrome	centers_distance	0.269771	0.355854	0.163	0.222466	0.287284
398	398	MEturquoise	NF	0.26943	0.35655	0.159	0.224333	0.290039
399	399	MEdarkgrey	NucleusArea	0.269138	0.357127	0.143	0.220413	0.286188
400	400	MEbrown2	NucbyCytoArea	0.269081	0.357248	0.131	0.220655	0.284142
401	401	MEcoral3	CellArea	0.267345	0.360592	0.165	0.221934	0.28753
402	402	MED4-AS1	Protrusion_area	0.26721	0.360842	0.176	0.221298	0.287821
403	403	MEpink4	centers_distance	0.266827	0.361644	0.168	0.22081	0.286126
404	404	MEpaleturquoise	ruffliness	0.264795	0.365505	0.174	0.221436	0.284845
405	405	MEgrey60	NucbyCytoArea	0.26413	0.36684	0.197	0.221818	0.283488
406	406	MEdarkolivegreen	Nuc_WidthToLength	0.263871	0.367349	0.168	0.218533	0.283068
407	407	MYC	centers_distance	0.26304	0.36891	0.191	0.220117	0.282834
408	408	Homology Directed Repair	Nuc_WidthToLength	0.262534	0.369889	0.183	0.218783	0.282369
409	409	MEsalmon4	CellArea	0.262157	0.370674	0.193	0.218066	0.284147
410	410	MEplum2	CellArea	0.261465	0.372042	0.183	0.217605	0.281613
411	411	MEantiquewhite4	Protrusion_area	0.261166	0.37263	0.185	0.217507	0.280548
412	412	MEsalmon	Protrusion_area	0.260848	0.373228	0.196	0.215526	0.282041
413	413	MEdarkolivegreen	CellArea	0.260474	0.373911	0.19	0.21481	0.281311
414	414	MEdarkolivegreen4	Nuclear_Roundness	0.260279	0.374309	0.189	0.216102	0.279215
415	415	MEyellowgreen	ruffliness	0.259032	0.376789	0.207	0.214492	0.2815
416	416	MEnavajowhite1	Protrusion_area	0.258512	0.377774	0.213	0.215576	0.280303
417	417	MEhoneydew	Nuc_WidthToLength	0.258193	0.378423	0.172	0.211285	0.276598
418	418	MEpalevioletred3	NucbyCytoArea	0.257298	0.380232	0.193	0.211898	0.277465
419	419	MElightcyan	centers_distance	0.257071	0.380647	0.194	0.212801	0.275396
420	420	MEsienna3	Cell_WidthToLength	0.256475	0.381861	0.194	0.212863	0.275739
421	421	Module_NA_1	Nuclear_Roundness	0.255598	0.383644	0.182	0.213183	0.275565
422	422	MEpaleturquoise	centers_distance	0.25538	0.384073	0.178	0.212278	0.272056
423	423	MEsalmon	Cell_WidthToLength	0.255292	0.38423	0.19	0.212059	0.275662
424	424	chr7	NucleusArea	0.255061	0.384732	0.169	0.211217	0.275475
425	425	MEivory	NucbyCytoArea	0.254862	0.385138	0.164	0.211628	0.272814
426	426	MEmediumpurple2	Protrusion_area	0.253502	0.387949	0.218	0.210433	0.27387
427	427	MEbrown2	centers_distance	0.253096	0.388762	0.194	0.210306	0.273725
428	428	MElightcyan1	centers_distance	0.252993	0.388972	0.189	0.209763	0.274439
429	429	MEred	ruffliness	0.251874	0.391286	0.175	0.207854	0.270017
430	430	MEfloralwhite	Cell_WidthToLength	0.251849	0.39133	0.18	0.208275	0.27149
431	431	MEskyblue3	Cell_WidthToLength	0.251765	0.391503	0.184	0.208636	0.271171
432	432	Homology Directed Repair	Cell_WidthToLength	0.251731	0.391583	0.172	0.207601	0.269806
433	433	MEfirebrick3	ruffliness	0.251518	0.39201	0.178	0.208905	0.268912
434	434	MEred	Nuclear_Roundness	0.251395	0.392275	0.16	0.204433	0.266095
435	435	ZRANB2-AS1	Protrusion_area	0.250506	0.394013	0.165	0.205828	0.266369
436	436	MEdarkseagreen4	ruffliness	0.250283	0.394457	0.177	0.204757	0.269342
437	437	Module_NA_1	NF	0.250275	0.394482	0.171	0.205615	0.267685
438	438	MElightcoral	Nuclear_Roundness	0.250145	0.394751	0.157	0.206304	0.271795
439	439	MEwhite	CellArea	0.249284	0.396544	0.159	0.20358	0.267539
440	440	MEsienna4	Cell_WidthToLength	0.247555	0.400037	0.163	0.20476	0.264638
441	441	MEviolet	NucleusArea	0.247485	0.400198	0.174	0.205157	0.265177
442	442	MEpalevioletred3	Protrusion_area	0.24726	0.400662	0.18	0.204391	0.266193
443	443	MElightcyan	Nuc_WidthToLength	0.246561	0.402078	0.177	0.2026	0.263989
444	444	UBE2Q1-AS1	NucleusArea	0.246304	0.40262	0.179	0.203576	0.263936
445	445	MYC	NucbyCytoArea	0.243765	0.407852	0.214	0.201218	0.263559
446	446	MEantiquewhite2	Nuc_WidthToLength	0.243666	0.408034	0.194	0.200488	0.263761
447	447	MEmediumorchid	Nuclear_Roundness	0.243013	0.4094	0.2	0.201605	0.259368
448	448	MElightcoral	NF	0.242946	0.40954	0.187	0.201037	0.261815
449	449	MEviolet	Nuc_WidthToLength	0.242861	0.409726	0.18	0.199027	0.258451
450	450	MElavenderblush3	NucleusArea	0.242281	0.410948	0.189	0.198786	0.261813
451	451	MEtan	NucleusArea	0.242252	0.411004	0.192	0.200178	0.259666
452	452	MEfloralwhite	ruffliness	0.240971	0.413647	0.187	0.199122	0.259114
453	453	MEmediumpurple4	centers_distance	0.240616	0.414387	0.203	0.201188	0.258363
454	454	HER2 knockdown	Cell_WidthToLength	0.238978	0.417827	0.206	0.199866	0.258725
455	455	MEturquoise	Nuclear_Roundness	0.238229	0.419413	0.211	0.197237	0.257644
456	456	MEdarkmagenta	ruffliness	0.237974	0.419966	0.197	0.199913	0.258149
457	457	MEthistle	CellArea	0.237887	0.420157	0.204	0.197119	0.256516
458	458	MEthistle	NucleusArea	0.237847	0.420254	0.201	0.196191	0.257426
459	459	MEskyblue3	centers_distance	0.237594	0.420778	0.205	0.195381	0.254827
460	460	MEfirebrick3	Protrusion_area	0.236828	0.422377	0.19	0.196787	0.257944
461	461	MEmediumpurple2	Nuclear_Roundness	0.23561	0.424962	0.204	0.19665	0.256476
462	462	MEorangered4	Nuclear_Roundness	0.235471	0.425233	0.203	0.196823	0.252996
463	463	MED4-AS1	centers_distance	0.234417	0.427459	0.212	0.195016	0.254271
464	464	Krueppel-associated box _1	ruffliness	0.233538	0.429332	0.225	0.194088	0.255668
465	465	MEthistle	Nuclear_Roundness	0.233059	0.430371	0.224	0.193724	0.251354
466	466	MEmediumpurple2	Nuc_WidthToLength	0.232756	0.431034	0.23	0.192879	0.251362
467	467	ARRDC3-AS1	NucleusArea	0.232718	0.431115	0.212	0.19166	0.249667
468	468	MEfirebrick4	Nuclear_Roundness	0.232362	0.431879	0.22	0.193641	0.251392
469	469	Collagen Formation	centers_distance	0.232161	0.432358	0.208	0.191955	0.251314
470	470	MEivory	Nuc_WidthToLength	0.232018	0.43265	0.205	0.190811	0.253909
471	471	Module_NA_1	ruffliness	0.231734	0.433225	0.204	0.189487	0.251248
472	472	VIPR1-AS1	Nuc_WidthToLength	0.231073	0.43457	0.195	0.192114	0.247621
473	473	MEcoral2	NucleusArea	0.231002	0.434728	0.203	0.192671	0.249484
474	474	MElavenderblush3	Nuc_WidthToLength	0.230646	0.435442	0.187	0.190115	0.251324
475	475	MEblack	CellArea	0.230536	0.435713	0.191	0.189157	0.246946
476	476	5HT2 type receptor mediated signaling	Nuclear_Roundness	0.229918	0.437028	0.177	0.188092	0.248832
477	477	MEdarkviolet	NF	0.229812	0.437277	0.185	0.188629	0.247622
478	478	MEhoneydew1	centers_distance	0.229502	0.437954	0.209	0.18947	0.246663
479	479	ARNT KO	Nuclear_Roundness	0.229417	0.43813	0.186	0.187287	0.248338
480	480	MEsienna4	Nuc_WidthToLength	0.227673	0.441948	0.189	0.187601	0.247909
481	481	MEgreenyellow	Nuclear_Roundness	0.227345	0.442687	0.224	0.187246	0.245153
482	482	MEnavajowhite1	NF	0.226831	0.443774	0.181	0.188091	0.244681
483	483	MEsienna4	centers_distance	0.226806	0.443821	0.194	0.186027	0.244236
484	484	chr7	Nuc_WidthToLength	0.226753	0.443936	0.178	0.185879	0.2444
485	485	MAL2-AS1	centers_distance	0.226233	0.445036	0.18	0.185464	0.243315
486	486	MEmediumpurple1	centers_distance	0.22617	0.445192	0.174	0.185979	0.240421
487	487	MEfirebrick4	NucbyCytoArea	0.226151	0.445235	0.154	0.186793	0.243724
488	488	MEhoneydew1	NF	0.225829	0.445933	0.159	0.183599	0.244807
489	489	MEmediumpurple1	NucbyCytoArea	0.225781	0.446052	0.168	0.184103	0.245023
490	490	MEmagenta4	Protrusion_area	0.225611	0.446434	0.146	0.180741	0.243061
491	491	MEplum	ruffliness	0.224828	0.44811	0.144	0.183179	0.241555
492	492	Lysosome	Nuc_WidthToLength	0.224012	0.449876	0.174	0.182609	0.242396
493	493	MEthistle1	centers_distance	0.223904	0.450071	0.159	0.181726	0.238224
494	494	MEbrown	ruffliness	0.223738	0.450432	0.146	0.181818	0.239457
495	495	MEbrown	Nuclear_Roundness	0.223601	0.45076	0.176	0.181868	0.240082
496	496	Li-Fraumeni Syndrome	Nuc_WidthToLength	0.223516	0.450937	0.13	0.179224	0.236622
497	497	MEcoral2	Nuclear_Roundness	0.222529	0.453007	0.159	0.181428	0.239027
498	498	MEpaleturquoise	Protrusion_area	0.222037	0.454	0.149	0.180981	0.236485
499	499	TNF signaling	centers_distance	0.221046	0.456204	0.17	0.18135	0.23736
500	500	RAP1 signaling	Nuclear_Roundness	0.221024	0.456239	0.143	0.179824	0.234814
501	501	Module_NA_2	ruffliness	0.220167	0.45811	0.15	0.178627	0.23396
502	502	MEyellowgreen	centers_distance	0.219087	0.460478	0.16	0.178486	0.235889
503	503	MEsienna3	Protrusion_area	0.218908	0.460894	0.16	0.177599	0.232357
504	504	MYC	ruffliness	0.217833	0.463222	0.177	0.177182	0.235009
505	505	MEpaleturquoise	NucbyCytoArea	0.21683	0.465394	0.186	0.179514	0.23196
506	506	MEmagenta4	NucleusArea	0.216434	0.466258	0.185	0.177339	0.230562
507	507	MEmediumorchid	centers_distance	0.21538	0.46853	0.205	0.177135	0.234022
508	508	MEdarkolivegreen	Protrusion_area	0.215224	0.468858	0.175	0.176445	0.230564
509	509	MEsteelblue	Nuclear_Roundness	0.215159	0.468991	0.175	0.17592	0.232703
510	510	MEdarkred	NF	0.214804	0.469767	0.18	0.177344	0.230805
511	511	HER2 knockdown	ruffliness	0.214706	0.470008	0.187	0.176433	0.232085
512	512	Krueppel-associated box _1	NF	0.2147	0.470021	0.154	0.17327	0.228814
513	513	MEtan	NucbyCytoArea	0.213452	0.472755	0.164	0.175186	0.229316
514	514	18662380-S3-ESR1	Nuc_WidthToLength	0.213249	0.4732	0.151	0.174331	0.22641
515	515	MEdarkviolet	Protrusion_area	0.212267	0.475318	0.198	0.176055	0.230525
516	516	MEsienna4	Nuclear_Roundness	0.21177	0.47635	0.173	0.175144	0.231753
517	517	ZRANB2-AS1	NucleusArea	0.211767	0.476357	0.178	0.17277	0.228559
518	518	Retinol metabolism	centers_distance	0.210408	0.479326	0.181	0.171666	0.22638
519	519	MElightpink4	NucbyCytoArea	0.210374	0.479401	0.182	0.171087	0.228408
520	520	MEsalmon4	Cell_WidthToLength	0.210269	0.479643	0.186	0.172121	0.227115
521	521	MEmidnightblue	NucleusArea	0.210027	0.480151	0.176	0.171089	0.228345
522	522	MEsteelblue	ruffliness	0.209418	0.481511	0.176	0.169406	0.226773
523	523	MEhoneydew1	Nuc_WidthToLength	0.208279	0.483993	0.174	0.170262	0.225421
524	524	UBE2Q1-AS1	NF	0.208171	0.484255	0.181	0.170225	0.225974
525	525	MEblack	centers_distance	0.208047	0.484535	0.182	0.169458	0.223663
526	526	MElightcyan1	Cell_WidthToLength	0.20785	0.484959	0.162	0.168826	0.223789
527	527	MEbisque4	centers_distance	0.207537	0.485656	0.169	0.169605	0.221629
528	528	MYC	Protrusion_area	0.205518	0.490158	0.21	0.168503	0.221792
529	529	Collagen Formation	Protrusion_area	0.204442	0.492607	0.193	0.165445	0.220865
530	530	UBE2Q1-AS1	Nuc_WidthToLength	0.204311	0.492914	0.201	0.16827	0.222928
531	531	MEdarkolivegreen4	ruffliness	0.204217	0.493131	0.174	0.168197	0.221206
532	532	MEgreenyellow	Nuc_WidthToLength	0.204197	0.493184	0.196	0.167188	0.22115
533	533	MEpaleturquoise	Nuclear_Roundness	0.203926	0.493817	0.201	0.165704	0.221359
534	534	MEsienna3	NucleusArea	0.202611	0.496681	0.21	0.16609	0.220937
535	535	MEpalevioletred3	NucleusArea	0.200878	0.500616	0.221	0.165117	0.220726
536	536	MEpink4	ruffliness	0.20067	0.501112	0.214	0.166286	0.218396
537	537	MEmagenta4	CellArea	0.200629	0.501228	0.215	0.165124	0.217384
538	538	MEivory	centers_distance	0.199891	0.502837	0.229	0.166304	0.217977
539	539	MEturquoise	centers_distance	0.196931	0.509355	0.271	0.163338	0.217746
540	540	MEbrown	Nuc_WidthToLength	0.196378	0.510635	0.288	0.164116	0.217435
541	541	MEdarkred	CellArea	0.196327	0.510748	0.295	0.163339	0.216819
542	542	MEcyan	ruffliness	0.195753	0.51204	0.292	0.164989	0.21639
543	543	MEskyblue3	NucbyCytoArea	0.195505	0.512595	0.243	0.162204	0.215494
544	544	MEantiquewhite4	Cell_WidthToLength	0.19491	0.513927	0.266	0.162383	0.215033
545	545	MEnavajowhite1	Nuclear_Roundness	0.194311	0.515292	0.241	0.161362	0.213168
546	546	MEhoneydew	Cell_WidthToLength	0.194183	0.515568	0.25	0.162722	0.21422
547	547	MEskyblue3	ruffliness	0.194064	0.515825	0.25	0.16004	0.213478
548	548	MEdarkred	centers_distance	0.193465	0.517179	0.256	0.16066	0.21127
549	549	ARRDC3-AS1	NF	0.193382	0.517375	0.241	0.160961	0.212577
550	550	MEdarkseagreen3	centers_distance	0.192594	0.519125	0.272	0.160174	0.212568
551	551	Estradiol_2	Protrusion_area	0.189609	0.525856	0.297	0.159558	0.211858
552	552	MEivory	Cell_WidthToLength	0.187698	0.530234	0.353	0.159803	0.213619
553	553	MEdarkolivegreen	NucleusArea	0.186977	0.531886	0.388	0.157614	0.212751
554	554	MEdarkslateblue	NucleusArea	0.186624	0.532707	0.351	0.15891	0.208758
555	555	MEbrown2	Nuclear_Roundness	0.186624	0.532708	0.368	0.15759	0.2121
556	556	MEdarkred	NucleusArea	0.186504	0.532981	0.339	0.158652	0.209076
557	557	MEsteelblue	Cell_WidthToLength	0.185777	0.534597	0.338	0.158084	0.207243
558	558	MEmediumpurple4	ruffliness	0.185517	0.535163	0.356	0.155231	0.205698
559	559	5HT2 type receptor mediated signaling	centers_distance	0.185448	0.535306	0.342	0.158005	0.208108
560	560	MEpink4	CellArea	0.185376	0.535458	0.341	0.154808	0.206225
561	561	MEdarkolivegreen4	NucbyCytoArea	0.185014	0.53632	0.335	0.154565	0.207344
562	562	MEsienna4	NF	0.184791	0.536836	0.314	0.15456	0.206296
563	563	MEdarkviolet	Nuc_WidthToLength	0.184705	0.53705	0.304	0.154089	0.204463
564	564	MEdarkgrey	Cell_WidthToLength	0.184106	0.538436	0.339	0.155256	0.205115
565	565	MED4-AS1	NucleusArea	0.182795	0.541471	0.346	0.154067	0.203166
566	566	MEcoral3	Nuclear_Roundness	0.182242	0.542805	0.322	0.152091	0.204864
567	567	MEbisque4	CellArea	0.182017	0.543296	0.322	0.153597	0.201685
568	568	MEantiquewhite4	Nuclear_Roundness	0.181944	0.543458	0.34	0.152797	0.204086
569	569	MEsalmon2	Nuc_WidthToLength	0.181391	0.544748	0.345	0.15227	0.205332
570	570	MEhoneydew1	Protrusion_area	0.181163	0.545263	0.313	0.153332	0.202761
571	571	MEthistle	Protrusion_area	0.180439	0.546914	0.34	0.151892	0.20367
572	572	MElightyellow	NucbyCytoArea	0.180411	0.546985	0.352	0.15241	0.202778
573	573	MElightyellow	CellArea	0.180373	0.54707	0.315	0.152742	0.200929
574	574	Hs ETC	ruffliness	0.180213	0.547438	0.314	0.151549	0.201258
575	575	MEorangered4	CellArea	0.179986	0.547974	0.306	0.150264	0.200753
576	576	MEnavajowhite1	centers_distance	0.179759	0.548535	0.307	0.149703	0.19915
577	577	MEmediumpurple2	NucleusArea	0.179598	0.548889	0.271	0.149478	0.197593
578	578	MEtan	Protrusion_area	0.17862	0.551132	0.307	0.149362	0.199893
579	579	MEfirebrick4	CellArea	0.178545	0.551273	0.303	0.149201	0.197475
580	580	ARNT KO	Protrusion_area	0.178384	0.551636	0.279	0.147282	0.199308
581	581	MEmediumpurple1	Cell_WidthToLength	0.178202	0.552057	0.287	0.147888	0.198603
582	582	MEantiquewhite4	NucleusArea	0.177863	0.552881	0.277	0.148757	0.200102
583	583	MEblack	Protrusion_area	0.177699	0.55327	0.26	0.147567	0.195397
584	584	MEdarkolivegreen4	CellArea	0.177448	0.55383	0.274	0.147809	0.196104
585	585	MEmagenta4	Nuclear_Roundness	0.176999	0.55495	0.245	0.147867	0.19491
586	586	MEdarkgrey	CellArea	0.176935	0.555105	0.254	0.146868	0.195068
587	587	MEpaleturquoise	NucleusArea	0.176498	0.556159	0.261	0.145819	0.192751
588	588	Module_NA_4	NF	0.175063	0.559576	0.28	0.144397	0.193995
589	589	MElightpink4	NF	0.174962	0.559795	0.261	0.143414	0.195328
590	590	MEantiquewhite2	Nuclear_Roundness	0.174494	0.560835	0.253	0.144554	0.195929
591	591	H3K27ac H1 Derived MSC	centers_distance	0.172836	0.564743	0.285	0.143876	0.192324
592	592	Hedgehog 'off' state	Cell_WidthToLength	0.171846	0.567007	0.342	0.143004	0.19377
593	593	MElightgreen	Cell_WidthToLength	0.170777	0.569494	0.325	0.144462	0.191737
594	594	Module_NA_4	NucbyCytoArea	0.169859	0.571659	0.359	0.143503	0.191001
595	595	VIPR1-AS1	Cell_WidthToLength	0.169112	0.573424	0.398	0.14472	0.193708
596	596	Estradiol_2	centers_distance	0.169002	0.573665	0.351	0.142722	0.190899
597	597	MEfirebrick3	NucleusArea	0.168801	0.574181	0.349	0.142611	0.189639
598	598	MYC	Nuclear_Roundness	0.168795	0.574204	0.374	0.141709	0.18888
599	599	MEantiquewhite2	Protrusion_area	0.168399	0.575145	0.342	0.14311	0.188647
600	600	MEviolet	centers_distance	0.168344	0.575286	0.375	0.142164	0.190408
601	601	MEsienna3	CellArea	0.168157	0.575725	0.333	0.141234	0.186949
602	602	MEivory	Nuclear_Roundness	0.167286	0.577807	0.353	0.140211	0.186191
603	603	MEplum	NucleusArea	0.167167	0.578072	0.334	0.140572	0.188768
604	604	MEdarkolivegreen4	Nuc_WidthToLength	0.167148	0.578123	0.339	0.139585	0.185865
605	605	ARNT KO	NucleusArea	0.165769	0.581297	0.393	0.141056	0.187246
606	606	MEcoral2	Cell_WidthToLength	0.165206	0.582689	0.352	0.138607	0.183657
607	607	MEplum	Protrusion_area	0.164993	0.583178	0.352	0.139002	0.184452
608	608	MEplum	Cell_WidthToLength	0.164607	0.584148	0.371	0.136695	0.185081
609	609	MEantiquewhite2	ruffliness	0.164462	0.584496	0.327	0.137758	0.184513
610	610	MEdarkred	Nuc_WidthToLength	0.164097	0.585369	0.326	0.137172	0.184494
611	611	Lysosome	NucleusArea	0.16378	0.586121	0.323	0.137907	0.183727
612	612	MEblack	NucleusArea	0.163524	0.586696	0.323	0.13698	0.184073
613	613	Krueppel-associated box_2	Protrusion_area	0.163232	0.58742	0.318	0.135683	0.183423
614	614	MElightpink4	centers_distance	0.162398	0.589431	0.329	0.135761	0.180107
615	615	Module_NA_2	Protrusion_area	0.162318	0.589605	0.313	0.134161	0.182322
616	616	MEpink4	NucleusArea	0.162107	0.590128	0.299	0.135552	0.179046
617	617	MEbrown2	Nuc_WidthToLength	0.161864	0.590707	0.298	0.136439	0.181057
618	618	MEgrey60	ruffliness	0.161791	0.590886	0.316	0.133988	0.183176
619	619	MEorangered1	ruffliness	0.161742	0.590997	0.277	0.132517	0.18215
620	620	MEbrown2	CellArea	0.161517	0.591535	0.272	0.133776	0.179828
621	621	MEorangered1	centers_distance	0.161126	0.592472	0.288	0.134623	0.179098
622	622	MEskyblue3	Nuc_WidthToLength	0.16101	0.592756	0.289	0.1338	0.178618
623	623	MEdarkseagreen4	Nuclear_Roundness	0.160994	0.592786	0.277	0.131583	0.178564
624	624	MEantiquewhite2	NucleusArea	0.160272	0.594448	0.278	0.132795	0.177873
625	625	MEmediumpurple2	NucbyCytoArea	0.159871	0.595414	0.276	0.13109	0.180365
626	626	MEhoneydew1	NucleusArea	0.159716	0.595765	0.254	0.132493	0.174862
627	627	MEdarkgrey	Nuclear_Roundness	0.159579	0.596099	0.269	0.130877	0.176636
628	628	MEwhite	Cell_WidthToLength	0.159281	0.596794	0.261	0.130928	0.174857
629	629	MElightsteelblue	Protrusion_area	0.158768	0.598035	0.245	0.127834	0.177178
630	630	MElightcoral	Nuc_WidthToLength	0.157838	0.600232	0.291	0.130764	0.176727
631	631	MEdarkslateblue	Cell_WidthToLength	0.156994	0.602185	0.297	0.1283	0.175109
632	632	MEviolet	NF	0.156394	0.603588	0.297	0.128719	0.174999
633	633	Krueppel-associated box _1	Protrusion_area	0.155296	0.606242	0.281	0.129232	0.174403
634	634	HER2 knockdown	NF	0.15519	0.606511	0.325	0.128645	0.171922
635	635	MElightpink4	ruffliness	0.155006	0.606947	0.296	0.12863	0.17194
636	636	MEsienna3	centers_distance	0.154956	0.607037	0.261	0.128261	0.172208
637	637	TNF signaling	Protrusion_area	0.153644	0.610207	0.308	0.128154	0.173893
638	638	MEsalmon2	centers_distance	0.152712	0.612469	0.323	0.127092	0.171063
639	639	MEyellowgreen	NucbyCytoArea	0.152052	0.614061	0.319	0.128006	0.170054
640	640	MEdarkgrey	ruffliness	0.15107	0.616395	0.365	0.126532	0.171573
641	641	5HT2 type receptor mediated signaling	NucleusArea	0.150624	0.617501	0.348	0.125302	0.168957
642	642	MEdarkslateblue	Protrusion_area	0.15002	0.618975	0.355	0.126379	0.170844
643	643	MEsienna4	ruffliness	0.149738	0.619627	0.368	0.124894	0.169958
644	644	ZRANB2-AS1	ruffliness	0.149688	0.619735	0.356	0.124852	0.170218
645	645	MEdarkslateblue	centers_distance	0.149541	0.62006	0.368	0.123835	0.170177
646	646	MEorangered1	Protrusion_area	0.14936	0.620491	0.349	0.123121	0.167342
647	647	MElightyellow	NucleusArea	0.149348	0.620529	0.307	0.123854	0.165602
648	648	Module_NA_1	Protrusion_area	0.14893	0.621538	0.312	0.125271	0.16708
649	649	MEskyblue4	Protrusion_area	0.14856	0.622384	0.305	0.124407	0.1664
650	650	MEivory	NucleusArea	0.148345	0.622882	0.321	0.122796	0.167176
651	651	MElightyellow	Protrusion_area	0.148271	0.623064	0.276	0.122392	0.165764
652	652	Estradiol_1	Protrusion_area	0.147001	0.626159	0.314	0.122769	0.164422
653	653	MEgreenyellow	NF	0.146743	0.626775	0.308	0.122046	0.164427
654	654	MEdarkseagreen3	Nuclear_Roundness	0.144675	0.631774	0.367	0.121185	0.164156
655	655	MEviolet	CellArea	0.144276	0.632706	0.364	0.121891	0.16543
656	656	MYC	NucleusArea	0.144136	0.63304	0.347	0.119753	0.16288
657	657	MElightsteelblue	NucleusArea	0.144068	0.633195	0.35	0.121738	0.163548
658	658	H3K27ac H1 Derived MSC	NF	0.143195	0.635391	0.355	0.119135	0.159817
659	659	MAL2-AS1	Nuc_WidthToLength	0.142786	0.636363	0.347	0.118501	0.163425
660	660	chr16q24	centers_distance	0.141738	0.638828	0.375	0.119097	0.163227
661	661	MEdarkgrey	NF	0.141428	0.639568	0.359	0.118465	0.160385
662	662	MElightpink4	Nuclear_Roundness	0.141229	0.640012	0.364	0.117935	0.160888
663	663	MEorangered3	NucbyCytoArea	0.140767	0.641107	0.368	0.117807	0.160402
664	664	MEdarkviolet	NucleusArea	0.14018	0.642478	0.391	0.117279	0.161097
665	665	MEyellowgreen	NF	0.140056	0.64277	0.393	0.117162	0.159342
666	666	MEmediumpurple4	Protrusion_area	0.139749	0.64356	0.357	0.116363	0.157596
667	667	Collagen Formation	NucleusArea	0.13963	0.643853	0.346	0.116674	0.156847
668	668	MEdarkmagenta	NF	0.138835	0.645765	0.411	0.116066	0.157146
669	669	MEsienna4	CellArea	0.138787	0.645868	0.347	0.116342	0.157344
670	670	MEmidnightblue	NF	0.138635	0.64623	0.371	0.11619	0.157805
671	671	MEnavajowhite1	NucbyCytoArea	0.137552	0.648825	0.368	0.115175	0.154104
672	672	Krueppel-associated box _1	NucleusArea	0.137317	0.649381	0.341	0.115442	0.156502
673	673	MEdarkslateblue	NucbyCytoArea	0.135434	0.654088	0.398	0.115098	0.156559
674	674	MEfloralwhite	NucbyCytoArea	0.135272	0.654502	0.417	0.115008	0.155257
675	675	Module_NA_3	NucleusArea	0.134822	0.655661	0.407	0.114271	0.154685
676	676	Module_NA_1	NucleusArea	0.134535	0.656374	0.384	0.113647	0.155422
677	677	MEthistle1	ruffliness	0.132857	0.660424	0.441	0.113907	0.153761
678	678	MEpalevioletred3	NF	0.132671	0.66087	0.433	0.112758	0.152579
679	679	Collagen Formation	Nuclear_Roundness	0.132539	0.661205	0.44	0.113158	0.15209
680	680	MEcoral1	CellArea	0.13105	0.664769	0.487	0.112019	0.154506
681	681	MEgrey60	Nuclear_Roundness	0.130951	0.665006	0.477	0.111814	0.152024
682	682	chr16q24	Nuclear_Roundness	0.130215	0.666786	0.49	0.112033	0.151701
683	683	MEmediumpurple4	NucleusArea	0.130101	0.667057	0.455	0.110248	0.150698
684	684	Li-Fraumeni Syndrome	NucleusArea	0.129446	0.668726	0.462	0.110135	0.14981
685	685	MElightcyan	ruffliness	0.128859	0.670132	0.472	0.110667	0.150671
686	686	MEdarkmagenta	Nuclear_Roundness	0.128189	0.671857	0.477	0.110369	0.150486
687	687	MEgrey60	CellArea	0.127475	0.673617	0.482	0.109614	0.150571
688	688	Krueppel-associated box_2	NucleusArea	0.126607	0.675831	0.513	0.109759	0.149889
689	689	MEdarkseagreen3	NucleusArea	0.125812	0.677739	0.512	0.108286	0.148662
690	690	Hs ETC	Nuclear_Roundness	0.125702	0.677995	0.54	0.107709	0.147397
691	691	MEdarkolivegreen	Nuclear_Roundness	0.125653	0.678103	0.494	0.107515	0.14957
692	692	Module_NA_2	NF	0.125209	0.679212	0.496	0.106296	0.14606
693	693	MEpalevioletred3	ruffliness	0.124975	0.67979	0.514	0.105136	0.147235
694	694	MEhoneydew	Nuclear_Roundness	0.124777	0.680303	0.502	0.10634	0.146088
695	695	MEorangered3	Nuc_WidthToLength	0.124592	0.680745	0.485	0.106414	0.145692
696	696	MEpink4	Protrusion_area	0.123515	0.683327	0.521	0.106629	0.143412
697	697	Krueppel-associated box_2	NF	0.122502	0.685812	0.537	0.106501	0.145506
698	698	MEorangered3	Nuclear_Roundness	0.121279	0.688893	0.581	0.105507	0.143799
699	699	MEskyblue4	Nuc_WidthToLength	0.121175	0.689131	0.59	0.105472	0.142848
700	700	MEdarkred	Nuclear_Roundness	0.12104	0.689481	0.554	0.105304	0.144334
701	701	MEskyblue2	centers_distance	0.12088	0.689878	0.574	0.105119	0.142016
702	702	MEivory	Protrusion_area	0.120518	0.690794	0.548	0.10426	0.144922
703	703	MEsalmon	centers_distance	0.120436	0.691	0.53	0.103297	0.142616
704	704	MEturquoise	Nuc_WidthToLength	0.120324	0.691302	0.527	0.10305	0.142424
705	705	MElightgreen	centers_distance	0.120195	0.691627	0.507	0.103081	0.138645
706	706	Collagen Formation	Nuc_WidthToLength	0.119976	0.69216	0.462	0.103284	0.140129
707	707	Hedgehog 'off' state	centers_distance	0.119957	0.692212	0.485	0.103034	0.141303
708	708	MEtan	Cell_WidthToLength	0.119939	0.692259	0.456	0.102673	0.140435
709	709	RAP1 signaling	centers_distance	0.118079	0.696987	0.538	0.101509	0.138798
710	710	chr16q24	Protrusion_area	0.117973	0.697245	0.514	0.0999737	0.138352
711	711	MYC	NF	0.116941	0.699874	0.534	0.100648	0.136914
712	712	MEhoneydew1	CellArea	0.116825	0.700175	0.515	0.101108	0.136874
713	713	Estradiol_2	Nuc_WidthToLength	0.116076	0.702032	0.543	0.100173	0.138001
714	714	MEsienna3	Nuclear_Roundness	0.116042	0.702112	0.545	0.100229	0.13647
715	715	MEorangered3	NF	0.115465	0.703474	0.526	0.100199	0.137087
716	716	MEskyblue4	NucleusArea	0.114794	0.705187	0.556	0.0991307	0.137024
717	717	MEpalevioletred3	Nuclear_Roundness	0.114101	0.706824	0.552	0.0984943	0.137784
718	718	MEdarkmagenta	Protrusion_area	0.113926	0.707248	0.567	0.0993038	0.135633
719	719	MEdarkmagenta	NucleusArea	0.113744	0.707733	0.545	0.0976534	0.135616
720	720	MEmediumpurple2	CellArea	0.11296	0.709715	0.558	0.0987798	0.132984
721	721	MEblack	NF	0.112796	0.710138	0.552	0.0980003	0.134345
722	722	MEmagenta4	Cell_WidthToLength	0.112739	0.710282	0.559	0.0991337	0.133503
723	723	Insulin Signaling	Nuc_WidthToLength	0.112646	0.71049	0.535	0.0968122	0.13386
724	724	MEbisque4	ruffliness	0.112615	0.710577	0.509	0.0965528	0.133771
725	725	MEcoral2	centers_distance	0.112396	0.711137	0.504	0.0970761	0.132466
726	726	MEcoral2	NF	0.112319	0.711349	0.504	0.0962343	0.132037
727	727	MEskyblue3	Protrusion_area	0.112129	0.71181	0.459	0.0953299	0.131101
728	728	Module_NA_4	centers_distance	0.111735	0.712764	0.479	0.0955922	0.130146
729	729	MEbrown2	NF	0.111591	0.713124	0.467	0.0923585	0.129902
730	730	MEplum	Nuclear_Roundness	0.111037	0.714471	0.465	0.0940228	0.131527
731	731	MAL2-AS1	Nuclear_Roundness	0.110203	0.716597	0.5	0.0935243	0.130232
732	732	MEdarkgrey	NucbyCytoArea	0.109353	0.718683	0.538	0.0931445	0.13046
733	733	Estradiol_2	NucleusArea	0.109318	0.718761	0.533	0.0931417	0.127967
734	734	MEdarkred	Protrusion_area	0.109185	0.719099	0.488	0.0931655	0.129339
735	735	Module_NA_3	Nuclear_Roundness	0.109113	0.71928	0.493	0.0918191	0.130098
736	736	MEfirebrick4	Protrusion_area	0.108841	0.719952	0.466	0.0919554	0.125963
737	737	MElightgreen	CellArea	0.108811	0.720016	0.465	0.0912502	0.12636
738	738	MEmediumpurple4	Cell_WidthToLength	0.107863	0.722374	0.491	0.0913751	0.126166
739	739	Estradiol_1	Nuc_WidthToLength	0.107453	0.723382	0.468	0.091381	0.125146
740	740	MEskyblue2	Cell_WidthToLength	0.107204	0.723973	0.479	0.0908962	0.127486
741	741	MEnavajowhite1	ruffliness	0.106852	0.724861	0.469	0.0900908	0.12606
742	742	HER2 knockdown	Protrusion_area	0.106834	0.724907	0.462	0.0893834	0.125268
743	743	MEwhite	centers_distance	0.106176	0.726569	0.474	0.0902555	0.124839
744	744	MEorangered1	NucleusArea	0.106	0.727062	0.445	0.0891667	0.124584
745	745	MEred	CellArea	0.105474	0.728405	0.434	0.0879655	0.124148
746	746	MEskyblue4	centers_distance	0.10457	0.730676	0.48	0.0890433	0.123089
747	747	MEfloralwhite	NF	0.104208	0.731567	0.484	0.0886364	0.121938
748	748	Lysosome	Protrusion_area	0.104017	0.732073	0.495	0.0887349	0.121406
749	749	Module_NA_2	NucleusArea	0.103361	0.733755	0.492	0.0872752	0.123272
750	750	TNF signaling	NucleusArea	0.101064	0.739571	0.556	0.086829	0.120825
751	751	MEplum2	NF	0.10088	0.739998	0.574	0.0866828	0.121711
752	752	Module_NA_3	Protrusion_area	0.0986051	0.745741	0.646	0.0872888	0.119267
753	753	MEblack	ruffliness	0.0977358	0.747881	0.688	0.0860563	0.121229
754	754	MElightgreen	NucleusArea	0.0977123	0.747938	0.662	0.0853783	0.119494
755	755	Module_NA_3	Cell_WidthToLength	0.0960349	0.752315	0.718	0.0850862	0.119878
756	756	MEskyblue3	NucleusArea	0.0953926	0.753859	0.743	0.0856746	0.118419
757	757	MElavenderblush3	NucbyCytoArea	0.0950859	0.754632	0.735	0.0857666	0.118412
758	758	MEfloralwhite	CellArea	0.0946869	0.755645	0.715	0.0846318	0.117853
759	759	MEbrown2	Protrusion_area	0.0939824	0.757423	0.726	0.0841282	0.115923
760	760	MElightcyan1	NucbyCytoArea	0.0938453	0.757783	0.754	0.0837642	0.116648
761	761	Insulin Signaling	NucleusArea	0.0938046	0.757882	0.722	0.0841483	0.11638
762	762	MEantiquewhite4	centers_distance	0.0931917	0.759441	0.729	0.0838809	0.116306
763	763	MEtan	Nuc_WidthToLength	0.0926424	0.760792	0.708	0.0817284	0.115295
764	764	MEfloralwhite	Nuclear_Roundness	0.092567	0.760984	0.723	0.0829596	0.114277
765	765	MEplum2	ruffliness	0.0925371	0.761046	0.687	0.0821899	0.11553
766	766	Estradiol_1	NucleusArea	0.0924331	0.761316	0.708	0.0808741	0.113372
767	767	MEskyblue2	Protrusion_area	0.0908129	0.765375	0.743	0.0814417	0.114025
768	768	5HT2 type receptor mediated signaling	Protrusion_area	0.090756	0.765516	0.747	0.0808217	0.113678
769	769	chr16q24	NucleusArea	0.090021	0.767387	0.735	0.081341	0.112731
770	770	MEcoral2	Nuc_WidthToLength	0.0899172	0.767637	0.721	0.081069	0.113209
771	771	MEskyblue4	CellArea	0.0882057	0.771955	0.779	0.0798551	0.113477
772	772	MEdarkseagreen3	Protrusion_area	0.0879271	0.77265	0.767	0.0789928	0.111694
773	773	MEdarkmagenta	Nuc_WidthToLength	0.0875525	0.773634	0.785	0.0793726	0.111444
774	774	MEgrey60	centers_distance	0.0874531	0.77389	0.776	0.078034	0.109951
775	775	MEgreenyellow	ruffliness	0.0873803	0.774073	0.753	0.0790707	0.11029
776	776	MEcyan	Nuclear_Roundness	0.0869073	0.775248	0.762	0.0782363	0.108869
777	777	Insulin Signaling	Cell_WidthToLength	0.0867661	0.775557	0.75	0.0778296	0.109148
778	778	Retinol metabolism	Cell_WidthToLength	0.086716	0.77567	0.735	0.0772196	0.108717
779	779	MEpalevioletred3	centers_distance	0.0859724	0.777542	0.75	0.0759754	0.108448
780	780	MEroyalblue	Nuc_WidthToLength	0.0855037	0.778775	0.779	0.077073	0.109246
781	781	MEplum	NucbyCytoArea	0.0854131	0.779011	0.747	0.0756716	0.107751
782	782	MEred	Cell_WidthToLength	0.083846	0.782975	0.79	0.0762062	0.108258
783	783	MEbrown	NucleusArea	0.0837732	0.783141	0.797	0.0757012	0.105913
784	784	Hedgehog 'off' state	Nuclear_Roundness	0.0835707	0.783633	0.78	0.0757639	0.104429
785	785	MEtan	NF	0.0827152	0.785775	0.785	0.0751449	0.106001
786	786	ECM organisation	Protrusion_area	0.082234	0.787021	0.802	0.0745062	0.10637
787	787	MEplum	NF	0.0821431	0.787257	0.791	0.0741294	0.103797
788	788	MEroyalblue	Nuclear_Roundness	0.0818146	0.788071	0.793	0.0745123	0.104231
789	789	MAL2-AS1	NucleusArea	0.0818061	0.788091	0.789	0.0726839	0.103279
790	790	MEorangered1	NF	0.0814308	0.789057	0.79	0.0736342	0.103236
791	791	MEcyan	NucbyCytoArea	0.0811987	0.789629	0.781	0.0734016	0.103627
792	792	MEsienna3	Nuc_WidthToLength	0.0805117	0.791382	0.781	0.0724397	0.102831
793	793	MEantiquewhite4	NucbyCytoArea	0.0800398	0.792561	0.777	0.0727282	0.102854
794	794	MEturquoise	NucleusArea	0.0799159	0.792843	0.796	0.0717961	0.102033
795	795	MEfloralwhite	centers_distance	0.0793793	0.794195	0.795	0.0710255	0.100206
796	796	Homology Directed Repair	Protrusion_area	0.078829	0.795554	0.82	0.0706785	0.101763
797	797	MEcoral1	NucleusArea	0.078549	0.796227	0.798	0.0706656	0.0997009
798	798	MElightpink4	CellArea	0.0781435	0.797226	0.79	0.0702972	0.0997076
799	799	MElightcyan1	ruffliness	0.0778354	0.79802	0.782	0.0698793	0.0999927
800	800	MElightcyan1	Protrusion_area	0.0775605	0.798739	0.785	0.0700254	0.100253
801	801	MED4-AS1	Nuc_WidthToLength	0.077506	0.798871	0.779	0.0696678	0.0990521
802	802	Insulin Signaling	Protrusion_area	0.0767698	0.800703	0.79	0.0694637	0.0977971
803	803	MElightgreen	Protrusion_area	0.0764901	0.801436	0.808	0.0695243	0.096953
804	804	MEhoneydew	NucbyCytoArea	0.0761002	0.802422	0.782	0.0682011	0.0974423
805	805	MEfirebrick3	NucbyCytoArea	0.0757629	0.803283	0.804	0.0688298	0.0978813
806	806	Insulin Signaling	Nuclear_Roundness	0.0751472	0.804832	0.817	0.0679353	0.0963587
807	807	Krueppel-associated box_2	ruffliness	0.0750792	0.805009	0.78	0.0674955	0.095382
808	808	MEsalmon4	Nuclear_Roundness	0.0749506	0.805323	0.784	0.0677	0.0946997
809	809	Module_NA_4	ruffliness	0.0741396	0.807458	0.782	0.0668109	0.0958888
810	810	Li-Fraumeni Syndrome	Protrusion_area	0.0738638	0.808128	0.789	0.0666811	0.0950393
811	811	MElightpink4	Cell_WidthToLength	0.0736184	0.808723	0.777	0.0656985	0.0939275
812	812	MEorangered4	NF	0.0728938	0.810579	0.799	0.066112	0.0953086
813	813	RAP1 signaling	NucleusArea	0.0728374	0.810727	0.78	0.065316	0.0934541
814	814	MEplum	centers_distance	0.072445	0.811715	0.773	0.0647025	0.0934553
815	815	MEdarkseagreen4	CellArea	0.0722904	0.812122	0.785	0.0650706	0.0922773
816	816	MEwhite	Nuc_WidthToLength	0.0719277	0.813118	0.772	0.0648	0.0929835
817	817	MEorangered1	CellArea	0.0718114	0.813402	0.762	0.0650632	0.0923621
818	818	MEorangered4	Protrusion_area	0.0716885	0.813697	0.749	0.0641183	0.0920618
819	819	MEorangered4	Nuc_WidthToLength	0.0710407	0.815295	0.778	0.0635807	0.0908612
820	820	MEantiquewhite4	NF	0.0710331	0.815312	0.776	0.062762	0.0910592
821	821	MEyellowgreen	CellArea	0.0710139	0.815369	0.758	0.0631527	0.0905262
822	822	MEyellowgreen	Cell_WidthToLength	0.070091	0.817731	0.769	0.0629362	0.0897959
823	823	MEbisque4	NF	0.0698508	0.818347	0.744	0.0612134	0.0898114
824	824	MEcoral3	Protrusion_area	0.0697562	0.818594	0.724	0.0617651	0.0884834
825	825	MElightcyan1	Nuc_WidthToLength	0.0695876	0.819073	0.756	0.0609762	0.087836
826	826	MEroyalblue	centers_distance	0.0689842	0.820584	0.733	0.0608925	0.0888337
827	827	MEdarkviolet	centers_distance	0.0685045	0.821825	0.768	0.0607664	0.087867
828	828	MEskyblue4	ruffliness	0.0677326	0.823803	0.792	0.0611714	0.08871
829	829	MEplum2	Nuc_WidthToLength	0.0671055	0.825437	0.781	0.0601774	0.0869066
830	830	MEmediumorchid	Nuc_WidthToLength	0.0665644	0.826817	0.799	0.0605404	0.0856033
831	831	CPEB2-DT	NF	0.0664085	0.827204	0.806	0.0600444	0.0869039
832	832	MEthistle1	CellArea	0.0663024	0.827471	0.769	0.059537	0.0851442
833	833	MEorangered3	centers_distance	0.0661778	0.82778	0.761	0.0591762	0.0857361
834	834	MEdarkred	NucbyCytoArea	0.0660916	0.828021	0.717	0.0583153	0.0842461
835	835	MEcoral2	ruffliness	0.0650667	0.830607	0.786	0.0576749	0.0839307
836	836	MEmediumorchid	Protrusion_area	0.0648106	0.831276	0.75	0.0575281	0.0834516
837	837	MEpink4	Nuc_WidthToLength	0.0647117	0.831527	0.75	0.0575138	0.0820714
838	838	MEsalmon	Nuclear_Roundness	0.0644567	0.832154	0.744	0.0572002	0.0822819
839	839	Hedgehog 'off' state	Protrusion_area	0.064357	0.832411	0.719	0.0567323	0.0823308
840	840	MElightyellow	Nuc_WidthToLength	0.0639871	0.833376	0.736	0.0568498	0.0817688
841	841	MEcyan	Nuc_WidthToLength	0.0635143	0.83459	0.732	0.0560264	0.081779
842	842	MEbrown2	NucleusArea	0.0632036	0.83542	0.725	0.0560515	0.0814497
843	843	MEantiquewhite4	Nuc_WidthToLength	0.0630626	0.835779	0.731	0.0558524	0.0814524
844	844	MEantiquewhite2	NF	0.0621985	0.838041	0.747	0.0544268	0.0796998
845	845	MEmediumpurple1	CellArea	0.0619431	0.83866	0.75	0.0545019	0.0797671
846	846	MElavenderblush3	NF	0.0616133	0.839509	0.759	0.0549782	0.0805323
847	847	MEsteelblue	CellArea	0.0612257	0.840434	0.735	0.0542156	0.0784132
848	848	MElightsteelblue	Nuclear_Roundness	0.0610042	0.84101	0.75	0.0538119	0.0792745
849	849	MEorangered4	ruffliness	0.0602226	0.843	0.741	0.0532686	0.0780156
850	850	MEmagenta4	centers_distance	0.060206	0.843042	0.725	0.0527438	0.0784569
851	851	MEfirebrick3	CellArea	0.0598253	0.844044	0.734	0.0519316	0.0769868
852	852	MEroyalblue	NucbyCytoArea	0.0595435	0.844765	0.722	0.0525358	0.076509
853	853	MEdarkseagreen4	centers_distance	0.0595009	0.844885	0.73	0.052292	0.0760554
854	854	MEdarkgrey	Nuc_WidthToLength	0.0587669	0.846745	0.758	0.0525238	0.0748394
855	855	MEturquoise	Cell_WidthToLength	0.0586719	0.846998	0.746	0.0513746	0.0752467
856	856	MEturquoise	Protrusion_area	0.0584524	0.847567	0.743	0.050987	0.0750225
857	857	MEbrown	Protrusion_area	0.0567196	0.852013	0.799	0.0503797	0.0742242
858	858	MEthistle1	Protrusion_area	0.0560015	0.853899	0.832	0.0504603	0.0734646
859	859	Hedgehog 'off' state	NucleusArea	0.0558393	0.854339	0.789	0.0507602	0.0732223
860	860	MEmediumpurple2	Cell_WidthToLength	0.0556087	0.854906	0.774	0.0496286	0.0730854
861	861	MEcoral3	centers_distance	0.0554211	0.855397	0.794	0.0494053	0.0720069
862	862	MElightcyan1	CellArea	0.0550586	0.856324	0.787	0.0490361	0.0722302
863	863	18662380-S3-ESR1	NucleusArea	0.0550203	0.856425	0.798	0.0489694	0.0723039
864	864	MEred	Nuc_WidthToLength	0.0547937	0.85699	0.756	0.0480588	0.0731357
865	865	MEred	NucbyCytoArea	0.0543069	0.858304	0.764	0.0477752	0.071545
866	866	MEskyblue2	NF	0.0540977	0.858849	0.767	0.0477315	0.0714209
867	867	MEorangered1	NucbyCytoArea	0.0539282	0.859324	0.751	0.0474889	0.0701841
868	868	MEviolet	ruffliness	0.0538465	0.859524	0.745	0.0473111	0.069618
869	869	MElightcyan1	NF	0.0538105	0.85962	0.716	0.0474397	0.0692742
870	870	MEdarkslateblue	Nuclear_Roundness	0.0537031	0.859925	0.675	0.0459762	0.0698843
871	871	MEcoral1	centers_distance	0.0533681	0.860831	0.694	0.0462771	0.0687812
872	872	MEsalmon2	NucbyCytoArea	0.0528699	0.862145	0.698	0.0457981	0.0680631
873	873	MElightgreen	Nuc_WidthToLength	0.0527242	0.862522	0.701	0.0457689	0.0678394
874	874	MEorangered3	ruffliness	0.0525644	0.86293	0.682	0.0452959	0.0675868
875	875	VIPR1-AS1	centers_distance	0.0523311	0.863564	0.695	0.0451346	0.0675857
876	876	MEhoneydew1	NucbyCytoArea	0.0522093	0.863903	0.65	0.0442472	0.0648344
877	877	HER2 knockdown	NucleusArea	0.052055	0.864299	0.643	0.0430257	0.0657263
878	878	MEgreenyellow	NucleusArea	0.0518032	0.864954	0.649	0.0439249	0.0660937
879	879	MElightcyan1	NucleusArea	0.0516043	0.865469	0.612	0.0432567	0.0645421
880	880	MEsalmon	CellArea	0.0515229	0.865662	0.581	0.0430891	0.0641893
881	881	MEskyblue4	Nuclear_Roundness	0.0514063	0.865975	0.575	0.0428812	0.0646639
882	882	MEsalmon4	NucleusArea	0.0505057	0.868304	0.59	0.0416382	0.0635476
883	883	MEtan	Nuclear_Roundness	0.0499252	0.86986	0.633	0.0426521	0.0629616
884	884	MEthistle	centers_distance	0.0496939	0.87045	0.633	0.0420865	0.0626587
885	885	Hs ETC	Nuc_WidthToLength	0.0495195	0.870856	0.617	0.0421507	0.0620734
886	886	MEthistle1	NucleusArea	0.0490024	0.872175	0.626	0.0407705	0.0618828
887	887	MEdarkviolet	Cell_WidthToLength	0.0481198	0.87442	0.656	0.0405797	0.0615219
888	888	MElightgreen	NucbyCytoArea	0.0480257	0.874655	0.62	0.0406281	0.0610765
889	889	MEcoral3	NucleusArea	0.0476165	0.875703	0.624	0.0405312	0.0603107
890	890	Module_NA_4	Cell_WidthToLength	0.0465355	0.878505	0.686	0.0396229	0.0607391
891	891	MEhoneydew	CellArea	0.0463667	0.878937	0.686	0.0388782	0.0601789
892	892	MEdarkseagreen3	Nuc_WidthToLength	0.0463134	0.879071	0.649	0.0394384	0.0599673
893	893	MEroyalblue	ruffliness	0.0460567	0.879744	0.632	0.0388623	0.0579624
894	894	MElightsteelblue	NucbyCytoArea	0.0456876	0.880696	0.623	0.0378352	0.0586558
895	895	MEdarkseagreen4	Cell_WidthToLength	0.0448829	0.882919	0.679	0.0385684	0.0576473
896	896	MEskyblue3	Nuclear_Roundness	0.0448004	0.883112	0.652	0.0379978	0.0571689
897	897	MElightgreen	Nuclear_Roundness	0.0439694	0.885279	0.697	0.0379419	0.057016
898	898	MEsteelblue	NucbyCytoArea	0.042792	0.888307	0.727	0.0368389	0.0566979
899	899	MEorangered3	Protrusion_area	0.0426453	0.888688	0.767	0.0368265	0.057204
900	900	MElightpink4	NucleusArea	0.0424901	0.88911	0.719	0.0369785	0.0552357
901	901	Homology Directed Repair	centers_distance	0.0422136	0.889848	0.719	0.0358788	0.0555727
902	902	MEsalmon4	centers_distance	0.0414316	0.891874	0.741	0.0356273	0.0553946
903	903	MEcyan	CellArea	0.0408054	0.893463	0.762	0.0352087	0.054757
904	904	MEskyblue3	NF	0.0397402	0.896292	0.816	0.0351327	0.0544454
905	905	ECM organisation	Nuc_WidthToLength	0.0396676	0.89649	0.811	0.0350244	0.0538888
906	906	Insulin Signaling	centers_distance	0.0394591	0.897025	0.778	0.0346243	0.0532521
907	907	MEdarkslateblue	CellArea	0.0394117	0.89715	0.769	0.0344931	0.0535976
908	908	MElightyellow	Nuclear_Roundness	0.039136	0.897851	0.77	0.0343213	0.0523549
909	909	MEfirebrick4	centers_distance	0.0389426	0.898383	0.746	0.033236	0.0523202
910	910	chr7	ruffliness	0.0388554	0.898625	0.69	0.0329197	0.0523078
911	911	VIPR1-AS1	Protrusion_area	0.0386739	0.899103	0.722	0.0331283	0.051382
912	912	MEwhite	Nuclear_Roundness	0.0379602	0.900957	0.756	0.032756	0.0515025
913	913	MEdarkolivegreen	centers_distance	0.0373755	0.902479	0.752	0.0325673	0.0504015
914	914	MEantiquewhite2	NucbyCytoArea	0.0371111	0.903145	0.753	0.0312538	0.0502573
915	915	MElightpink4	Nuc_WidthToLength	0.0362976	0.905275	0.769	0.0314959	0.0487811
916	916	MYC	Nuc_WidthToLength	0.0361229	0.905713	0.763	0.0316585	0.0486996
917	917	MEsalmon2	CellArea	0.0357326	0.906711	0.795	0.0311585	0.0482345
918	918	MAL2-AS1	Protrusion_area	0.0356383	0.90695	0.745	0.0306145	0.0474685
919	919	Module_NA_4	Protrusion_area	0.0351265	0.908227	0.768	0.030267	0.0475554
920	920	MEsteelblue	Protrusion_area	0.0350645	0.908367	0.716	0.030113	0.0473688
921	921	MEfloralwhite	Nuc_WidthToLength	0.035025	0.908463	0.678	0.029918	0.0469477
922	922	MEviolet	Nuclear_Roundness	0.0347856	0.909055	0.693	0.0295367	0.0461811
923	923	MEpaleturquoise	Nuc_WidthToLength	0.0346861	0.909323	0.684	0.0295225	0.04643
924	924	MEivory	CellArea	0.0345728	0.909594	0.669	0.028479	0.0447968
925	925	MEmediumpurple1	Protrusion_area	0.0339279	0.911225	0.674	0.0283338	0.0448023
926	926	MEmediumpurple1	NucleusArea	0.0338324	0.91151	0.66	0.0280681	0.0446173
927	927	chr16q24	Nuc_WidthToLength	0.033796	0.911602	0.617	0.0273485	0.0438963
928	928	MEfirebrick4	NucleusArea	0.0337023	0.911851	0.609	0.0272552	0.0441126
929	929	MEroyalblue	Protrusion_area	0.033118	0.913333	0.649	0.0274157	0.0430655
930	930	MElightpink4	Protrusion_area	0.0329762	0.91372	0.561	0.0262142	0.0429093
931	931	MElightgreen	NF	0.0329598	0.913773	0.553	0.0263822	0.0422985
932	932	Retinol metabolism	Protrusion_area	0.0321259	0.915967	0.624	0.0261304	0.042082
933	933	MEskyblue3	CellArea	0.0320204	0.916236	0.578	0.0253364	0.0417266
934	934	Module_NA_4	CellArea	0.0320163	0.916246	0.525	0.0256251	0.0414388
935	935	RAP1 signaling	Nuc_WidthToLength	0.0317085	0.917085	0.558	0.0250505	0.0415291
936	936	MEgreenyellow	Protrusion_area	0.0315904	0.917382	0.509	0.024717	0.0399509
937	937	MEnavajowhite1	CellArea	0.030892	0.919183	0.543	0.0243795	0.0395179
938	938	MEpaleturquoise	Cell_WidthToLength	0.0304693	0.920276	0.569	0.0241092	0.0390765
939	939	MEhoneydew1	Cell_WidthToLength	0.03045	0.920334	0.492	0.0235398	0.0388911
940	940	MEroyalblue	NF	0.0299475	0.921647	0.518	0.0238444	0.0385043
941	941	Retinol metabolism	NucleusArea	0.0293621	0.923177	0.558	0.0231116	0.0382449
942	942	MEorangered3	NucleusArea	0.0287344	0.924767	0.564	0.0226248	0.0372951
943	943	Hs ETC	NucleusArea	0.0282538	0.92608	0.587	0.0224601	0.0370705
944	944	18662380-S3-ESR1	Protrusion_area	0.0280758	0.926567	0.577	0.0222359	0.036507
945	945	MEpaleturquoise	NF	0.0280109	0.926745	0.537	0.0221434	0.0359438
946	946	MEpink4	Nuclear_Roundness	0.0274162	0.928346	0.568	0.0215246	0.0362851
947	947	MElavenderblush3	CellArea	0.0264854	0.930642	0.651	0.0211836	0.0351896
948	948	MEsteelblue	Nuc_WidthToLength	0.0259111	0.932127	0.626	0.0205241	0.0346733
949	949	MElightyellow	centers_distance	0.0245155	0.935841	0.74	0.020852	0.0338186
950	950	Hedgehog 'off' state	Nuc_WidthToLength	0.022833	0.940164	0.859	0.0200059	0.0346635
951	951	MEgrey60	NF	0.0225748	0.940814	0.872	0.02011	0.0338268
952	952	MEantiquewhite2	CellArea	0.0223996	0.9413	0.839	0.019709	0.033482
953	953	MEmediumorchid	NucleusArea	0.0223755	0.941366	0.818	0.0190484	0.0330289
954	954	MEcyan	NucleusArea	0.0222863	0.941607	0.788	0.0193316	0.0321937
955	955	MEdarkslateblue	Nuc_WidthToLength	0.0219728	0.942362	0.786	0.018794	0.0323945
956	956	MEsienna4	Protrusion_area	0.021622	0.943231	0.797	0.0183271	0.0318782
957	957	ARNT KO	Nuc_WidthToLength	0.0213205	0.944014	0.802	0.0179765	0.030578
958	958	MEroyalblue	CellArea	0.0212004	0.944345	0.769	0.0179054	0.0307215
959	959	MElightsteelblue	Nuc_WidthToLength	0.0211654	0.944441	0.728	0.0173723	0.0304369
960	960	Hs ETC	Protrusion_area	0.0209552	0.944972	0.712	0.0171004	0.0298401
961	961	MEskyblue2	NucleusArea	0.0206913	0.945668	0.684	0.0167904	0.0293163
962	962	MElightcyan	NF	0.0206669	0.94573	0.678	0.0165629	0.0294936
963	963	MEsalmon	Nuc_WidthToLength	0.020326	0.946603	0.665	0.0162526	0.0282735
964	964	MEcyan	NF	0.0200844	0.947231	0.64	0.0158631	0.0285291
965	965	ECM organisation	NucleusArea	0.0186677	0.950905	0.773	0.0152389	0.0273792
966	966	MEbrown2	ruffliness	0.018297	0.951934	0.771	0.0150802	0.0268377
967	967	MEcoral2	CellArea	0.0179616	0.95283	0.776	0.0146365	0.0266357
968	968	Homology Directed Repair	NucleusArea	0.0177404	0.953401	0.73	0.014327	0.0270595
969	969	MEorangered1	Nuclear_Roundness	0.016941	0.95551	0.818	0.0145192	0.026109
970	970	Module_NA_3	Nuc_WidthToLength	0.0163548	0.956989	0.83	0.0136646	0.0249978
971	971	MEwhite	NucleusArea	0.0160961	0.957706	0.804	0.0136912	0.0246912
972	972	MEdarkgrey	centers_distance	0.0159847	0.95799	0.798	0.0132723	0.0244024
973	973	MEsalmon4	Nuc_WidthToLength	0.0159173	0.95818	0.787	0.0127965	0.0236798
974	974	MEmidnightblue	centers_distance	0.0154853	0.959342	0.78	0.0126969	0.0236611
975	975	5HT2 type receptor mediated signaling	Nuc_WidthToLength	0.0147294	0.961235	0.83	0.0123627	0.023257
976	976	MEplum2	NucbyCytoArea	0.0147166	0.961278	0.78	0.0119791	0.0220634
977	977	ZRANB2-AS1	NF	0.0146839	0.961368	0.762	0.0121686	0.0218477
978	978	MEfirebrick4	Nuc_WidthToLength	0.0145161	0.961785	0.7	0.0111739	0.0220669
979	979	MElavenderblush3	ruffliness	0.0139031	0.963405	0.757	0.0109105	0.0215309
980	980	MEpalevioletred3	CellArea	0.0135248	0.964433	0.746	0.0107892	0.0210743
981	981	MEcoral2	NucbyCytoArea	0.013524	0.964435	0.696	0.0105384	0.0200068
982	982	MEmediumpurple2	centers_distance	0.0119203	0.968569	0.862	0.0102688	0.0197348
983	983	MEfirebrick3	centers_distance	0.0118794	0.968686	0.839	0.0100823	0.019664
984	984	MEhoneydew1	Nuclear_Roundness	0.0117582	0.969039	0.82	0.0097861	0.0185218
985	985	Module_NA_1	Nuc_WidthToLength	0.0117488	0.969073	0.763	0.00913049	0.0186103
986	986	MEskyblue4	NF	0.011455	0.969847	0.746	0.00873467	0.0181452
987	987	MEantiquewhite2	centers_distance	0.0112387	0.970423	0.74	0.00870315	0.0179245
988	988	MEfirebrick4	Cell_WidthToLength	0.0110706	0.970851	0.711	0.00820373	0.017263
989	989	MEbisque4	NucleusArea	0.0107704	0.971662	0.691	0.00817074	0.0163394
990	990	MEsalmon2	Cell_WidthToLength	0.0104913	0.97242	0.694	0.00786938	0.0161938
991	991	MEsteelblue	centers_distance	0.00988897	0.974083	0.743	0.00764613	0.0160227
992	992	MEthistle1	NF	0.00925071	0.97573	0.786	0.0071492	0.015609
993	993	Krueppel-associated box _1	Nuc_WidthToLength	0.00886953	0.976749	0.793	0.0068393	0.014739
994	994	MEbisque4	Protrusion_area	0.00841685	0.977938	0.802	0.00664925	0.0148473
995	995	MEorangered4	NucleusArea	0.00815123	0.978618	0.776	0.00629928	0.0139755
996	996	CPEB2-DT	ruffliness	0.00810897	0.978708	0.721	0.00584184	0.0133371
997	997	MEantiquewhite4	CellArea	0.00810624	0.978712	0.654	0.00557101	0.0130588
998	998	MEcoral1	Protrusion_area	0.00808272	0.978765	0.597	0.00547921	0.0127278
999	999	MElavenderblush3	centers_distance	0.00735472	0.980698	0.672	0.00497719	0.0125261
1000	1000	MEwhite	Protrusion_area	0.00733272	0.980761	0.614	0.00494602	0.0118785
1001	1001	MEroyalblue	NucleusArea	0.00716863	0.981212	0.529	0.00455722	0.0109931
1002	1002	MEhoneydew	centers_distance	0.00696726	0.981739	0.499	0.00414687	0.0107414
1003	1003	MEsalmon4	Protrusion_area	0.0067679	0.982275	0.469	0.00397641	0.0103336
1004	1004	chr7	NF	0.0063502	0.983396	0.476	0.00371489	0.00975385
1005	1005	MEviolet	NucbyCytoArea	0.00587331	0.984679	0.499	0.00339587	0.00954473
1006	1006	MEcyan	Protrusion_area	0.00558845	0.985422	0.52	0.00325544	0.00908832
1007	1007	MEsienna4	NucleusArea	0.00557656	0.985453	0.381	0.00286824	0.00849113
1008	1008	MEplum2	centers_distance	0.00535365	0.986018	0.305	0.00242062	0.00773197
1009	1009	MElightsteelblue	CellArea	0.00530445	0.986156	0.255	0.00240228	0.00750289
1010	1010	Module_NA_4	NucleusArea	0.00450026	0.988252	0.372	0.00211231	0.00686003
1011	1011	MEantiquewhite4	ruffliness	0.00412081	0.989206	0.335	0.00189252	0.00664896
1012	1012	VIPR1-AS1	NucleusArea	0.00397015	0.989583	0.24	0.00146561	0.00617114
1013	1013	MEsteelblue	NucleusArea	0.00377854	0.990085	0.195	0.00131989	0.00537562
1014	1014	MEorangered3	CellArea	0.00376058	0.990127	0.129	0.00104762	0.00510866
1015	1015	RAP1 signaling	Protrusion_area	0.00333811	0.991191	0.126	0.000801611	0.00447261
1016	1016	MEtan	ruffliness	0.00325625	0.991401	0.074	0.000592034	0.00406609
1017	1017	MEmediumpurple4	NF	0.00302882	0.99202	0.052	0.000408692	0.00348003
1018	1018	MEorangered1	Nuc_WidthToLength	0.000767875	0.99797	0.641	0.000242846	0.00276726
1019	1019	MEcoral3	Nuc_WidthToLength	0.000638985	0.99831	0.498	0.000113996	0.00203099
1020	1020	MElightcyan1	Nuclear_Roundness	0.000548299	0.998566	0.227	8.88532e-06	0.00134584
