# Supplementary material for: Identification of phenotype-specific networks from paired gene expression–cell shape imaging data
Source: Genome Res. 2022 Apr;32(4):750–65. doi: 10.1101/gr.276059.121 (PMC8997347; doi:10.1101/gr.276059.121)
Supplement: Supplemental Material [file supp_gr.276059.121_Supplemental_Table_S2.xlsx]

## Sheet: table
Supplemental Table S2. Genes contained within each gene expression module.
genes	module_name
ENSG00000005156	18662380-S3-ESR1
ENSG00000006118	18662380-S3-ESR1
ENSG00000006459	18662380-S3-ESR1
ENSG00000006704	18662380-S3-ESR1
ENSG00000006756	18662380-S3-ESR1
ENSG00000007541	18662380-S3-ESR1
ENSG00000021645	18662380-S3-ESR1
ENSG00000040199	18662380-S3-ESR1
ENSG00000042062	18662380-S3-ESR1
ENSG00000042753	18662380-S3-ESR1
ENSG00000047578	18662380-S3-ESR1
ENSG00000048707	18662380-S3-ESR1
ENSG00000054793	18662380-S3-ESR1
ENSG00000055163	18662380-S3-ESR1
ENSG00000055609	18662380-S3-ESR1
ENSG00000056736	18662380-S3-ESR1
ENSG00000063601	18662380-S3-ESR1
ENSG00000064932	18662380-S3-ESR1
ENSG00000065621	18662380-S3-ESR1
ENSG00000066583	18662380-S3-ESR1
ENSG00000067836	18662380-S3-ESR1
ENSG00000070476	18662380-S3-ESR1
ENSG00000070731	18662380-S3-ESR1
ENSG00000071462	18662380-S3-ESR1
ENSG00000072071	18662380-S3-ESR1
ENSG00000073169	18662380-S3-ESR1
ENSG00000074370	18662380-S3-ESR1
ENSG00000075461	18662380-S3-ESR1
ENSG00000083838	18662380-S3-ESR1
ENSG00000088305	18662380-S3-ESR1
ENSG00000088808	18662380-S3-ESR1
ENSG00000095066	18662380-S3-ESR1
ENSG00000095397	18662380-S3-ESR1
ENSG00000095585	18662380-S3-ESR1
ENSG00000095906	18662380-S3-ESR1
ENSG00000099889	18662380-S3-ESR1
ENSG00000100075	18662380-S3-ESR1
ENSG00000100201	18662380-S3-ESR1
ENSG00000100263	18662380-S3-ESR1
ENSG00000100425	18662380-S3-ESR1
ENSG00000100997	18662380-S3-ESR1
ENSG00000101210	18662380-S3-ESR1
ENSG00000101213	18662380-S3-ESR1
ENSG00000101333	18662380-S3-ESR1
ENSG00000101442	18662380-S3-ESR1
ENSG00000102221	18662380-S3-ESR1
ENSG00000102349	18662380-S3-ESR1
ENSG00000102710	18662380-S3-ESR1
ENSG00000103024	18662380-S3-ESR1
ENSG00000103245	18662380-S3-ESR1
ENSG00000103657	18662380-S3-ESR1
ENSG00000104369	18662380-S3-ESR1
ENSG00000104447	18662380-S3-ESR1
ENSG00000104524	18662380-S3-ESR1
ENSG00000104852	18662380-S3-ESR1
ENSG00000104960	18662380-S3-ESR1
ENSG00000105373	18662380-S3-ESR1
ENSG00000106012	18662380-S3-ESR1
ENSG00000107281	18662380-S3-ESR1
ENSG00000107485	18662380-S3-ESR1
ENSG00000108306	18662380-S3-ESR1
ENSG00000108759	18662380-S3-ESR1
ENSG00000110911	18662380-S3-ESR1
ENSG00000110921	18662380-S3-ESR1
ENSG00000111110	18662380-S3-ESR1
ENSG00000111271	18662380-S3-ESR1
ENSG00000111275	18662380-S3-ESR1
ENSG00000111962	18662380-S3-ESR1
ENSG00000112144	18662380-S3-ESR1
ENSG00000112787	18662380-S3-ESR1
ENSG00000113719	18662380-S3-ESR1
ENSG00000114405	18662380-S3-ESR1
ENSG00000114737	18662380-S3-ESR1
ENSG00000114790	18662380-S3-ESR1
ENSG00000114805	18662380-S3-ESR1
ENSG00000115461	18662380-S3-ESR1
ENSG00000115468	18662380-S3-ESR1
ENSG00000115648	18662380-S3-ESR1
ENSG00000115649	18662380-S3-ESR1
ENSG00000116299	18662380-S3-ESR1
ENSG00000117013	18662380-S3-ESR1
ENSG00000117479	18662380-S3-ESR1
ENSG00000117533	18662380-S3-ESR1
ENSG00000117983	18662380-S3-ESR1
ENSG00000117984	18662380-S3-ESR1
ENSG00000118513	18662380-S3-ESR1
ENSG00000119402	18662380-S3-ESR1
ENSG00000119574	18662380-S3-ESR1
ENSG00000120149	18662380-S3-ESR1
ENSG00000120333	18662380-S3-ESR1
ENSG00000120675	18662380-S3-ESR1
ENSG00000120875	18662380-S3-ESR1
ENSG00000121270	18662380-S3-ESR1
ENSG00000122735	18662380-S3-ESR1
ENSG00000122912	18662380-S3-ESR1
ENSG00000123388	18662380-S3-ESR1
ENSG00000123415	18662380-S3-ESR1
ENSG00000124126	18662380-S3-ESR1
ENSG00000124370	18662380-S3-ESR1
ENSG00000124657	18662380-S3-ESR1
ENSG00000124664	18662380-S3-ESR1
ENSG00000125247	18662380-S3-ESR1
ENSG00000125534	18662380-S3-ESR1
ENSG00000127580	18662380-S3-ESR1
ENSG00000128011	18662380-S3-ESR1
ENSG00000128886	18662380-S3-ESR1
ENSG00000128928	18662380-S3-ESR1
ENSG00000130202	18662380-S3-ESR1
ENSG00000130414	18662380-S3-ESR1
ENSG00000130529	18662380-S3-ESR1
ENSG00000130590	18662380-S3-ESR1
ENSG00000130703	18662380-S3-ESR1
ENSG00000130724	18662380-S3-ESR1
ENSG00000130734	18662380-S3-ESR1
ENSG00000130741	18662380-S3-ESR1
ENSG00000131037	18662380-S3-ESR1
ENSG00000131242	18662380-S3-ESR1
ENSG00000131591	18662380-S3-ESR1
ENSG00000131759	18662380-S3-ESR1
ENSG00000132326	18662380-S3-ESR1
ENSG00000132932	18662380-S3-ESR1
ENSG00000133131	18662380-S3-ESR1
ENSG00000133243	18662380-S3-ESR1
ENSG00000133424	18662380-S3-ESR1
ENSG00000133619	18662380-S3-ESR1
ENSG00000133661	18662380-S3-ESR1
ENSG00000134533	18662380-S3-ESR1
ENSG00000134769	18662380-S3-ESR1
ENSG00000134815	18662380-S3-ESR1
ENSG00000135245	18662380-S3-ESR1
ENSG00000135709	18662380-S3-ESR1
ENSG00000136444	18662380-S3-ESR1
ENSG00000136935	18662380-S3-ESR1
ENSG00000138621	18662380-S3-ESR1
ENSG00000138796	18662380-S3-ESR1
ENSG00000139323	18662380-S3-ESR1
ENSG00000139438	18662380-S3-ESR1
ENSG00000139631	18662380-S3-ESR1
ENSG00000139865	18662380-S3-ESR1
ENSG00000139914	18662380-S3-ESR1
ENSG00000140332	18662380-S3-ESR1
ENSG00000140450	18662380-S3-ESR1
ENSG00000140688	18662380-S3-ESR1
ENSG00000140983	18662380-S3-ESR1
ENSG00000141013	18662380-S3-ESR1
ENSG00000141232	18662380-S3-ESR1
ENSG00000141527	18662380-S3-ESR1
ENSG00000142188	18662380-S3-ESR1
ENSG00000142235	18662380-S3-ESR1
ENSG00000143412	18662380-S3-ESR1
ENSG00000143845	18662380-S3-ESR1
ENSG00000143878	18662380-S3-ESR1
ENSG00000145808	18662380-S3-ESR1
ENSG00000146576	18662380-S3-ESR1
ENSG00000146776	18662380-S3-ESR1
ENSG00000148218	18662380-S3-ESR1
ENSG00000148290	18662380-S3-ESR1
ENSG00000148356	18662380-S3-ESR1
ENSG00000149743	18662380-S3-ESR1
ENSG00000149809	18662380-S3-ESR1
ENSG00000150593	18662380-S3-ESR1
ENSG00000150893	18662380-S3-ESR1
ENSG00000150995	18662380-S3-ESR1
ENSG00000151065	18662380-S3-ESR1
ENSG00000151715	18662380-S3-ESR1
ENSG00000154274	18662380-S3-ESR1
ENSG00000154767	18662380-S3-ESR1
ENSG00000156515	18662380-S3-ESR1
ENSG00000156976	18662380-S3-ESR1
ENSG00000157353	18662380-S3-ESR1
ENSG00000157388	18662380-S3-ESR1
ENSG00000157625	18662380-S3-ESR1
ENSG00000157693	18662380-S3-ESR1
ENSG00000158258	18662380-S3-ESR1
ENSG00000158373	18662380-S3-ESR1
ENSG00000158406	18662380-S3-ESR1
ENSG00000158792	18662380-S3-ESR1
ENSG00000159348	18662380-S3-ESR1
ENSG00000160007	18662380-S3-ESR1
ENSG00000160188	18662380-S3-ESR1
ENSG00000160325	18662380-S3-ESR1
ENSG00000160392	18662380-S3-ESR1
ENSG00000160401	18662380-S3-ESR1
ENSG00000160404	18662380-S3-ESR1
ENSG00000161996	18662380-S3-ESR1
ENSG00000161999	18662380-S3-ESR1
ENSG00000162032	18662380-S3-ESR1
ENSG00000162076	18662380-S3-ESR1
ENSG00000162105	18662380-S3-ESR1
ENSG00000162723	18662380-S3-ESR1
ENSG00000162782	18662380-S3-ESR1
ENSG00000163352	18662380-S3-ESR1
ENSG00000163536	18662380-S3-ESR1
ENSG00000163602	18662380-S3-ESR1
ENSG00000163617	18662380-S3-ESR1
ENSG00000163701	18662380-S3-ESR1
ENSG00000163873	18662380-S3-ESR1
ENSG00000164414	18662380-S3-ESR1
ENSG00000164626	18662380-S3-ESR1
ENSG00000164828	18662380-S3-ESR1
ENSG00000164855	18662380-S3-ESR1
ENSG00000164880	18662380-S3-ESR1
ENSG00000165140	18662380-S3-ESR1
ENSG00000165494	18662380-S3-ESR1
ENSG00000165548	18662380-S3-ESR1
ENSG00000165637	18662380-S3-ESR1
ENSG00000165724	18662380-S3-ESR1
ENSG00000165837	18662380-S3-ESR1
ENSG00000165879	18662380-S3-ESR1
ENSG00000166387	18662380-S3-ESR1
ENSG00000166529	18662380-S3-ESR1
ENSG00000166557	18662380-S3-ESR1
ENSG00000166575	18662380-S3-ESR1
ENSG00000166689	18662380-S3-ESR1
ENSG00000166987	18662380-S3-ESR1
ENSG00000167394	18662380-S3-ESR1
ENSG00000167470	18662380-S3-ESR1
ENSG00000167535	18662380-S3-ESR1
ENSG00000167536	18662380-S3-ESR1
ENSG00000167578	18662380-S3-ESR1
ENSG00000167700	18662380-S3-ESR1
ENSG00000167962	18662380-S3-ESR1
ENSG00000167964	18662380-S3-ESR1
ENSG00000167972	18662380-S3-ESR1
ENSG00000168159	18662380-S3-ESR1
ENSG00000168421	18662380-S3-ESR1
ENSG00000168936	18662380-S3-ESR1
ENSG00000168993	18662380-S3-ESR1
ENSG00000169083	18662380-S3-ESR1
ENSG00000169217	18662380-S3-ESR1
ENSG00000169738	18662380-S3-ESR1
ENSG00000169862	18662380-S3-ESR1
ENSG00000169951	18662380-S3-ESR1
ENSG00000170471	18662380-S3-ESR1
ENSG00000170684	18662380-S3-ESR1
ENSG00000171940	18662380-S3-ESR1
ENSG00000172366	18662380-S3-ESR1
ENSG00000172382	18662380-S3-ESR1
ENSG00000172725	18662380-S3-ESR1
ENSG00000172830	18662380-S3-ESR1
ENSG00000173041	18662380-S3-ESR1
ENSG00000173120	18662380-S3-ESR1
ENSG00000173153	18662380-S3-ESR1
ENSG00000173214	18662380-S3-ESR1
ENSG00000174151	18662380-S3-ESR1
ENSG00000174206	18662380-S3-ESR1
ENSG00000174233	18662380-S3-ESR1
ENSG00000174500	18662380-S3-ESR1
ENSG00000174744	18662380-S3-ESR1
ENSG00000174749	18662380-S3-ESR1
ENSG00000174871	18662380-S3-ESR1
ENSG00000174950	18662380-S3-ESR1
ENSG00000175198	18662380-S3-ESR1
ENSG00000175221	18662380-S3-ESR1
ENSG00000175274	18662380-S3-ESR1
ENSG00000176058	18662380-S3-ESR1
ENSG00000176771	18662380-S3-ESR1
ENSG00000176842	18662380-S3-ESR1
ENSG00000176884	18662380-S3-ESR1
ENSG00000176978	18662380-S3-ESR1
ENSG00000177106	18662380-S3-ESR1
ENSG00000177192	18662380-S3-ESR1
ENSG00000177303	18662380-S3-ESR1
ENSG00000177380	18662380-S3-ESR1
ENSG00000177465	18662380-S3-ESR1
ENSG00000177548	18662380-S3-ESR1
ENSG00000177981	18662380-S3-ESR1
ENSG00000178951	18662380-S3-ESR1
ENSG00000179348	18662380-S3-ESR1
ENSG00000180354	18662380-S3-ESR1
ENSG00000182318	18662380-S3-ESR1
ENSG00000182700	18662380-S3-ESR1
ENSG00000183508	18662380-S3-ESR1
ENSG00000183655	18662380-S3-ESR1
ENSG00000184227	18662380-S3-ESR1
ENSG00000184545	18662380-S3-ESR1
ENSG00000184678	18662380-S3-ESR1
ENSG00000184730	18662380-S3-ESR1
ENSG00000185052	18662380-S3-ESR1
ENSG00000185332	18662380-S3-ESR1
ENSG00000185352	18662380-S3-ESR1
ENSG00000185630	18662380-S3-ESR1
ENSG00000185658	18662380-S3-ESR1
ENSG00000186230	18662380-S3-ESR1
ENSG00000186283	18662380-S3-ESR1
ENSG00000186472	18662380-S3-ESR1
ENSG00000186654	18662380-S3-ESR1
ENSG00000186812	18662380-S3-ESR1
ENSG00000187024	18662380-S3-ESR1
ENSG00000187244	18662380-S3-ESR1
ENSG00000187486	18662380-S3-ESR1
ENSG00000187595	18662380-S3-ESR1
ENSG00000187601	18662380-S3-ESR1
ENSG00000187605	18662380-S3-ESR1
ENSG00000188199	18662380-S3-ESR1
ENSG00000188747	18662380-S3-ESR1
ENSG00000188811	18662380-S3-ESR1
ENSG00000188883	18662380-S3-ESR1
ENSG00000188959	18662380-S3-ESR1
ENSG00000196247	18662380-S3-ESR1
ENSG00000196547	18662380-S3-ESR1
ENSG00000196597	18662380-S3-ESR1
ENSG00000196642	18662380-S3-ESR1
ENSG00000196812	18662380-S3-ESR1
ENSG00000196981	18662380-S3-ESR1
ENSG00000197008	18662380-S3-ESR1
ENSG00000197070	18662380-S3-ESR1
ENSG00000197562	18662380-S3-ESR1
ENSG00000197774	18662380-S3-ESR1
ENSG00000197903	18662380-S3-ESR1
ENSG00000198466	18662380-S3-ESR1
ENSG00000198837	18662380-S3-ESR1
ENSG00000198858	18662380-S3-ESR1
ENSG00000198863	18662380-S3-ESR1
ENSG00000198879	18662380-S3-ESR1
ENSG00000198929	18662380-S3-ESR1
ENSG00000205269	18662380-S3-ESR1
ENSG00000205517	18662380-S3-ESR1
ENSG00000205593	18662380-S3-ESR1
ENSG00000205981	18662380-S3-ESR1
ENSG00000206530	18662380-S3-ESR1
ENSG00000213918	18662380-S3-ESR1
ENSG00000213930	18662380-S3-ESR1
ENSG00000214300	18662380-S3-ESR1
ENSG00000215305	18662380-S3-ESR1
ENSG00000215883	18662380-S3-ESR1
ENSG00000235169	18662380-S3-ESR1
ENSG00000237441	18662380-S3-ESR1
ENSG00000241484	18662380-S3-ESR1
ENSG00000243989	18662380-S3-ESR1
ENSG00000249471	18662380-S3-ESR1
ENSG00000255151	18662380-S3-ESR1
ENSG00000259431	18662380-S3-ESR1
ENSG00000263002	18662380-S3-ESR1
ENSG00000265972	18662380-S3-ESR1
ENSG00000266472	18662380-S3-ESR1
ENSG00000267545	18662380-S3-ESR1
ENSG00000269343	18662380-S3-ESR1
ENSG00000269556	18662380-S3-ESR1
ENSG00000272514	18662380-S3-ESR1
ENSG00000273802	18662380-S3-ESR1
ENSG00000276180	18662380-S3-ESR1
ENSG00000277224	18662380-S3-ESR1
ENSG00000278259	18662380-S3-ESR1
ENSG00000278637	18662380-S3-ESR1
ENSG00000278828	18662380-S3-ESR1
ENSG00000281593	18662380-S3-ESR1
ENSG00000003249	5HT2 type receptor mediated signaling
ENSG00000004478	5HT2 type receptor mediated signaling
ENSG00000005001	5HT2 type receptor mediated signaling
ENSG00000005194	5HT2 type receptor mediated signaling
ENSG00000006712	5HT2 type receptor mediated signaling
ENSG00000010165	5HT2 type receptor mediated signaling
ENSG00000011009	5HT2 type receptor mediated signaling
ENSG00000013275	5HT2 type receptor mediated signaling
ENSG00000013583	5HT2 type receptor mediated signaling
ENSG00000027001	5HT2 type receptor mediated signaling
ENSG00000027075	5HT2 type receptor mediated signaling
ENSG00000039123	5HT2 type receptor mediated signaling
ENSG00000040341	5HT2 type receptor mediated signaling
ENSG00000040608	5HT2 type receptor mediated signaling
ENSG00000043093	5HT2 type receptor mediated signaling
ENSG00000049618	5HT2 type receptor mediated signaling
ENSG00000052344	5HT2 type receptor mediated signaling
ENSG00000064115	5HT2 type receptor mediated signaling
ENSG00000064547	5HT2 type receptor mediated signaling
ENSG00000067606	5HT2 type receptor mediated signaling
ENSG00000070413	5HT2 type receptor mediated signaling
ENSG00000071073	5HT2 type receptor mediated signaling
ENSG00000072042	5HT2 type receptor mediated signaling
ENSG00000072518	5HT2 type receptor mediated signaling
ENSG00000073050	5HT2 type receptor mediated signaling
ENSG00000073578	5HT2 type receptor mediated signaling
ENSG00000075089	5HT2 type receptor mediated signaling
ENSG00000075275	5HT2 type receptor mediated signaling
ENSG00000076554	5HT2 type receptor mediated signaling
ENSG00000076944	5HT2 type receptor mediated signaling
ENSG00000079805	5HT2 type receptor mediated signaling
ENSG00000080603	5HT2 type receptor mediated signaling
ENSG00000081760	5HT2 type receptor mediated signaling
ENSG00000082458	5HT2 type receptor mediated signaling
ENSG00000082701	5HT2 type receptor mediated signaling
ENSG00000082996	5HT2 type receptor mediated signaling
ENSG00000083307	5HT2 type receptor mediated signaling
ENSG00000085644	5HT2 type receptor mediated signaling
ENSG00000085719	5HT2 type receptor mediated signaling
ENSG00000086232	5HT2 type receptor mediated signaling
ENSG00000087299	5HT2 type receptor mediated signaling
ENSG00000089248	5HT2 type receptor mediated signaling
ENSG00000089356	5HT2 type receptor mediated signaling
ENSG00000090020	5HT2 type receptor mediated signaling
ENSG00000092820	5HT2 type receptor mediated signaling
ENSG00000095209	5HT2 type receptor mediated signaling
ENSG00000095261	5HT2 type receptor mediated signaling
ENSG00000099194	5HT2 type receptor mediated signaling
ENSG00000099812	5HT2 type receptor mediated signaling
ENSG00000099875	5HT2 type receptor mediated signaling
ENSG00000100280	5HT2 type receptor mediated signaling
ENSG00000100311	5HT2 type receptor mediated signaling
ENSG00000100612	5HT2 type receptor mediated signaling
ENSG00000100625	5HT2 type receptor mediated signaling
ENSG00000100802	5HT2 type receptor mediated signaling
ENSG00000100842	5HT2 type receptor mediated signaling
ENSG00000100897	5HT2 type receptor mediated signaling
ENSG00000100911	5HT2 type receptor mediated signaling
ENSG00000101040	5HT2 type receptor mediated signaling
ENSG00000101057	5HT2 type receptor mediated signaling
ENSG00000101161	5HT2 type receptor mediated signaling
ENSG00000101255	5HT2 type receptor mediated signaling
ENSG00000101407	5HT2 type receptor mediated signaling
ENSG00000102078	5HT2 type receptor mediated signaling
ENSG00000102890	5HT2 type receptor mediated signaling
ENSG00000102893	5HT2 type receptor mediated signaling
ENSG00000102996	5HT2 type receptor mediated signaling
ENSG00000103067	5HT2 type receptor mediated signaling
ENSG00000103275	5HT2 type receptor mediated signaling
ENSG00000103653	5HT2 type receptor mediated signaling
ENSG00000103769	5HT2 type receptor mediated signaling
ENSG00000104133	5HT2 type receptor mediated signaling
ENSG00000104140	5HT2 type receptor mediated signaling
ENSG00000104320	5HT2 type receptor mediated signaling
ENSG00000104413	5HT2 type receptor mediated signaling
ENSG00000104549	5HT2 type receptor mediated signaling
ENSG00000104872	5HT2 type receptor mediated signaling
ENSG00000105053	5HT2 type receptor mediated signaling
ENSG00000105427	5HT2 type receptor mediated signaling
ENSG00000105568	5HT2 type receptor mediated signaling
ENSG00000105767	5HT2 type receptor mediated signaling
ENSG00000106144	5HT2 type receptor mediated signaling
ENSG00000107902	5HT2 type receptor mediated signaling
ENSG00000107968	5HT2 type receptor mediated signaling
ENSG00000108091	5HT2 type receptor mediated signaling
ENSG00000108604	5HT2 type receptor mediated signaling
ENSG00000109107	5HT2 type receptor mediated signaling
ENSG00000110013	5HT2 type receptor mediated signaling
ENSG00000111057	5HT2 type receptor mediated signaling
ENSG00000111261	5HT2 type receptor mediated signaling
ENSG00000111424	5HT2 type receptor mediated signaling
ENSG00000111481	5HT2 type receptor mediated signaling
ENSG00000111670	5HT2 type receptor mediated signaling
ENSG00000111679	5HT2 type receptor mediated signaling
ENSG00000111816	5HT2 type receptor mediated signaling
ENSG00000111907	5HT2 type receptor mediated signaling
ENSG00000111911	5HT2 type receptor mediated signaling
ENSG00000112357	5HT2 type receptor mediated signaling
ENSG00000112796	5HT2 type receptor mediated signaling
ENSG00000112852	5HT2 type receptor mediated signaling
ENSG00000113163	5HT2 type receptor mediated signaling
ENSG00000114331	5HT2 type receptor mediated signaling
ENSG00000114631	5HT2 type receptor mediated signaling
ENSG00000115339	5HT2 type receptor mediated signaling
ENSG00000116698	5HT2 type receptor mediated signaling
ENSG00000116990	5HT2 type receptor mediated signaling
ENSG00000117115	5HT2 type receptor mediated signaling
ENSG00000117362	5HT2 type receptor mediated signaling
ENSG00000117475	5HT2 type receptor mediated signaling
ENSG00000117480	5HT2 type receptor mediated signaling
ENSG00000117595	5HT2 type receptor mediated signaling
ENSG00000118096	5HT2 type receptor mediated signaling
ENSG00000118242	5HT2 type receptor mediated signaling
ENSG00000118640	5HT2 type receptor mediated signaling
ENSG00000118894	5HT2 type receptor mediated signaling
ENSG00000118900	5HT2 type receptor mediated signaling
ENSG00000119321	5HT2 type receptor mediated signaling
ENSG00000119396	5HT2 type receptor mediated signaling
ENSG00000119397	5HT2 type receptor mediated signaling
ENSG00000119401	5HT2 type receptor mediated signaling
ENSG00000119411	5HT2 type receptor mediated signaling
ENSG00000119431	5HT2 type receptor mediated signaling
ENSG00000119669	5HT2 type receptor mediated signaling
ENSG00000119686	5HT2 type receptor mediated signaling
ENSG00000119888	5HT2 type receptor mediated signaling
ENSG00000120685	5HT2 type receptor mediated signaling
ENSG00000120742	5HT2 type receptor mediated signaling
ENSG00000121390	5HT2 type receptor mediated signaling
ENSG00000122378	5HT2 type receptor mediated signaling
ENSG00000122882	5HT2 type receptor mediated signaling
ENSG00000123472	5HT2 type receptor mediated signaling
ENSG00000124214	5HT2 type receptor mediated signaling
ENSG00000124459	5HT2 type receptor mediated signaling
ENSG00000124466	5HT2 type receptor mediated signaling
ENSG00000125449	5HT2 type receptor mediated signaling
ENSG00000125637	5HT2 type receptor mediated signaling
ENSG00000125755	5HT2 type receptor mediated signaling
ENSG00000125834	5HT2 type receptor mediated signaling
ENSG00000125850	5HT2 type receptor mediated signaling
ENSG00000125877	5HT2 type receptor mediated signaling
ENSG00000126456	5HT2 type receptor mediated signaling
ENSG00000126460	5HT2 type receptor mediated signaling
ENSG00000126602	5HT2 type receptor mediated signaling
ENSG00000126878	5HT2 type receptor mediated signaling
ENSG00000127125	5HT2 type receptor mediated signaling
ENSG00000127399	5HT2 type receptor mediated signaling
ENSG00000128311	5HT2 type receptor mediated signaling
ENSG00000129354	5HT2 type receptor mediated signaling
ENSG00000129493	5HT2 type receptor mediated signaling
ENSG00000130193	5HT2 type receptor mediated signaling
ENSG00000130545	5HT2 type receptor mediated signaling
ENSG00000130726	5HT2 type receptor mediated signaling
ENSG00000130762	5HT2 type receptor mediated signaling
ENSG00000130768	5HT2 type receptor mediated signaling
ENSG00000131089	5HT2 type receptor mediated signaling
ENSG00000131778	5HT2 type receptor mediated signaling
ENSG00000131941	5HT2 type receptor mediated signaling
ENSG00000131979	5HT2 type receptor mediated signaling
ENSG00000132182	5HT2 type receptor mediated signaling
ENSG00000132359	5HT2 type receptor mediated signaling
ENSG00000132394	5HT2 type receptor mediated signaling
ENSG00000132623	5HT2 type receptor mediated signaling
ENSG00000132698	5HT2 type receptor mediated signaling
ENSG00000132849	5HT2 type receptor mediated signaling
ENSG00000133119	5HT2 type receptor mediated signaling
ENSG00000133313	5HT2 type receptor mediated signaling
ENSG00000133422	5HT2 type receptor mediated signaling
ENSG00000133477	5HT2 type receptor mediated signaling
ENSG00000133606	5HT2 type receptor mediated signaling
ENSG00000133678	5HT2 type receptor mediated signaling
ENSG00000134490	5HT2 type receptor mediated signaling
ENSG00000134709	5HT2 type receptor mediated signaling
ENSG00000135127	5HT2 type receptor mediated signaling
ENSG00000135378	5HT2 type receptor mediated signaling
ENSG00000135525	5HT2 type receptor mediated signaling
ENSG00000135698	5HT2 type receptor mediated signaling
ENSG00000135845	5HT2 type receptor mediated signaling
ENSG00000136021	5HT2 type receptor mediated signaling
ENSG00000136522	5HT2 type receptor mediated signaling
ENSG00000136536	5HT2 type receptor mediated signaling
ENSG00000136807	5HT2 type receptor mediated signaling
ENSG00000137261	5HT2 type receptor mediated signaling
ENSG00000137269	5HT2 type receptor mediated signaling
ENSG00000137513	5HT2 type receptor mediated signaling
ENSG00000138078	5HT2 type receptor mediated signaling
ENSG00000138794	5HT2 type receptor mediated signaling
ENSG00000139055	5HT2 type receptor mediated signaling
ENSG00000139132	5HT2 type receptor mediated signaling
ENSG00000139192	5HT2 type receptor mediated signaling
ENSG00000139517	5HT2 type receptor mediated signaling
ENSG00000139629	5HT2 type receptor mediated signaling
ENSG00000140832	5HT2 type receptor mediated signaling
ENSG00000141084	5HT2 type receptor mediated signaling
ENSG00000141664	5HT2 type receptor mediated signaling
ENSG00000142185	5HT2 type receptor mediated signaling
ENSG00000142252	5HT2 type receptor mediated signaling
ENSG00000142273	5HT2 type receptor mediated signaling
ENSG00000142327	5HT2 type receptor mediated signaling
ENSG00000142619	5HT2 type receptor mediated signaling
ENSG00000142675	5HT2 type receptor mediated signaling
ENSG00000143190	5HT2 type receptor mediated signaling
ENSG00000143320	5HT2 type receptor mediated signaling
ENSG00000143850	5HT2 type receptor mediated signaling
ENSG00000145979	5HT2 type receptor mediated signaling
ENSG00000146904	5HT2 type receptor mediated signaling
ENSG00000147400	5HT2 type receptor mediated signaling
ENSG00000147676	5HT2 type receptor mediated signaling
ENSG00000148153	5HT2 type receptor mediated signaling
ENSG00000148225	5HT2 type receptor mediated signaling
ENSG00000148606	5HT2 type receptor mediated signaling
ENSG00000149418	5HT2 type receptor mediated signaling
ENSG00000150054	5HT2 type receptor mediated signaling
ENSG00000150527	5HT2 type receptor mediated signaling
ENSG00000151470	5HT2 type receptor mediated signaling
ENSG00000152939	5HT2 type receptor mediated signaling
ENSG00000153214	5HT2 type receptor mediated signaling
ENSG00000153406	5HT2 type receptor mediated signaling
ENSG00000154914	5HT2 type receptor mediated signaling
ENSG00000155066	5HT2 type receptor mediated signaling
ENSG00000156052	5HT2 type receptor mediated signaling
ENSG00000156711	5HT2 type receptor mediated signaling
ENSG00000156831	5HT2 type receptor mediated signaling
ENSG00000156858	5HT2 type receptor mediated signaling
ENSG00000156958	5HT2 type receptor mediated signaling
ENSG00000157823	5HT2 type receptor mediated signaling
ENSG00000158158	5HT2 type receptor mediated signaling
ENSG00000158435	5HT2 type receptor mediated signaling
ENSG00000158769	5HT2 type receptor mediated signaling
ENSG00000159023	5HT2 type receptor mediated signaling
ENSG00000159166	5HT2 type receptor mediated signaling
ENSG00000159314	5HT2 type receptor mediated signaling
ENSG00000159461	5HT2 type receptor mediated signaling
ENSG00000160211	5HT2 type receptor mediated signaling
ENSG00000160588	5HT2 type receptor mediated signaling
ENSG00000161249	5HT2 type receptor mediated signaling
ENSG00000161558	5HT2 type receptor mediated signaling
ENSG00000161980	5HT2 type receptor mediated signaling
ENSG00000162063	5HT2 type receptor mediated signaling
ENSG00000162522	5HT2 type receptor mediated signaling
ENSG00000163159	5HT2 type receptor mediated signaling
ENSG00000163558	5HT2 type receptor mediated signaling
ENSG00000163624	5HT2 type receptor mediated signaling
ENSG00000163820	5HT2 type receptor mediated signaling
ENSG00000163898	5HT2 type receptor mediated signaling
ENSG00000163900	5HT2 type receptor mediated signaling
ENSG00000164300	5HT2 type receptor mediated signaling
ENSG00000164494	5HT2 type receptor mediated signaling
ENSG00000165097	5HT2 type receptor mediated signaling
ENSG00000165209	5HT2 type receptor mediated signaling
ENSG00000165238	5HT2 type receptor mediated signaling
ENSG00000165355	5HT2 type receptor mediated signaling
ENSG00000165813	5HT2 type receptor mediated signaling
ENSG00000165959	5HT2 type receptor mediated signaling
ENSG00000166145	5HT2 type receptor mediated signaling
ENSG00000166224	5HT2 type receptor mediated signaling
ENSG00000166228	5HT2 type receptor mediated signaling
ENSG00000166295	5HT2 type receptor mediated signaling
ENSG00000166348	5HT2 type receptor mediated signaling
ENSG00000167306	5HT2 type receptor mediated signaling
ENSG00000167632	5HT2 type receptor mediated signaling
ENSG00000167637	5HT2 type receptor mediated signaling
ENSG00000167767	5HT2 type receptor mediated signaling
ENSG00000167969	5HT2 type receptor mediated signaling
ENSG00000167977	5HT2 type receptor mediated signaling
ENSG00000168143	5HT2 type receptor mediated signaling
ENSG00000168610	5HT2 type receptor mediated signaling
ENSG00000168672	5HT2 type receptor mediated signaling
ENSG00000169189	5HT2 type receptor mediated signaling
ENSG00000169242	5HT2 type receptor mediated signaling
ENSG00000169251	5HT2 type receptor mediated signaling
ENSG00000170027	5HT2 type receptor mediated signaling
ENSG00000170417	5HT2 type receptor mediated signaling
ENSG00000170430	5HT2 type receptor mediated signaling
ENSG00000170561	5HT2 type receptor mediated signaling
ENSG00000171169	5HT2 type receptor mediated signaling
ENSG00000171219	5HT2 type receptor mediated signaling
ENSG00000171766	5HT2 type receptor mediated signaling
ENSG00000171806	5HT2 type receptor mediated signaling
ENSG00000171823	5HT2 type receptor mediated signaling
ENSG00000172765	5HT2 type receptor mediated signaling
ENSG00000172869	5HT2 type receptor mediated signaling
ENSG00000172893	5HT2 type receptor mediated signaling
ENSG00000173801	5HT2 type receptor mediated signaling
ENSG00000173898	5HT2 type receptor mediated signaling
ENSG00000174106	5HT2 type receptor mediated signaling
ENSG00000174292	5HT2 type receptor mediated signaling
ENSG00000175707	5HT2 type receptor mediated signaling
ENSG00000176658	5HT2 type receptor mediated signaling
ENSG00000177051	5HT2 type receptor mediated signaling
ENSG00000177885	5HT2 type receptor mediated signaling
ENSG00000178700	5HT2 type receptor mediated signaling
ENSG00000178718	5HT2 type receptor mediated signaling
ENSG00000178764	5HT2 type receptor mediated signaling
ENSG00000179104	5HT2 type receptor mediated signaling
ENSG00000179178	5HT2 type receptor mediated signaling
ENSG00000179862	5HT2 type receptor mediated signaling
ENSG00000179918	5HT2 type receptor mediated signaling
ENSG00000180011	5HT2 type receptor mediated signaling
ENSG00000180104	5HT2 type receptor mediated signaling
ENSG00000180251	5HT2 type receptor mediated signaling
ENSG00000180979	5HT2 type receptor mediated signaling
ENSG00000181192	5HT2 type receptor mediated signaling
ENSG00000181333	5HT2 type receptor mediated signaling
ENSG00000181885	5HT2 type receptor mediated signaling
ENSG00000182107	5HT2 type receptor mediated signaling
ENSG00000182134	5HT2 type receptor mediated signaling
ENSG00000184363	5HT2 type receptor mediated signaling
ENSG00000184675	5HT2 type receptor mediated signaling
ENSG00000184731	5HT2 type receptor mediated signaling
ENSG00000184857	5HT2 type receptor mediated signaling
ENSG00000185250	5HT2 type receptor mediated signaling
ENSG00000185414	5HT2 type receptor mediated signaling
ENSG00000185591	5HT2 type receptor mediated signaling
ENSG00000185883	5HT2 type receptor mediated signaling
ENSG00000186493	5HT2 type receptor mediated signaling
ENSG00000186603	5HT2 type receptor mediated signaling
ENSG00000188021	5HT2 type receptor mediated signaling
ENSG00000188064	5HT2 type receptor mediated signaling
ENSG00000188112	5HT2 type receptor mediated signaling
ENSG00000188559	5HT2 type receptor mediated signaling
ENSG00000188643	5HT2 type receptor mediated signaling
ENSG00000189060	5HT2 type receptor mediated signaling
ENSG00000189114	5HT2 type receptor mediated signaling
ENSG00000189143	5HT2 type receptor mediated signaling
ENSG00000196262	5HT2 type receptor mediated signaling
ENSG00000196391	5HT2 type receptor mediated signaling
ENSG00000196576	5HT2 type receptor mediated signaling
ENSG00000196586	5HT2 type receptor mediated signaling
ENSG00000196670	5HT2 type receptor mediated signaling
ENSG00000196781	5HT2 type receptor mediated signaling
ENSG00000196872	5HT2 type receptor mediated signaling
ENSG00000197147	5HT2 type receptor mediated signaling
ENSG00000197822	5HT2 type receptor mediated signaling
ENSG00000198093	5HT2 type receptor mediated signaling
ENSG00000198382	5HT2 type receptor mediated signaling
ENSG00000198911	5HT2 type receptor mediated signaling
ENSG00000203499	5HT2 type receptor mediated signaling
ENSG00000204389	5HT2 type receptor mediated signaling
ENSG00000204519	5HT2 type receptor mediated signaling
ENSG00000204580	5HT2 type receptor mediated signaling
ENSG00000204673	5HT2 type receptor mediated signaling
ENSG00000205336	5HT2 type receptor mediated signaling
ENSG00000205352	5HT2 type receptor mediated signaling
ENSG00000205937	5HT2 type receptor mediated signaling
ENSG00000206053	5HT2 type receptor mediated signaling
ENSG00000213186	5HT2 type receptor mediated signaling
ENSG00000213853	5HT2 type receptor mediated signaling
ENSG00000215271	5HT2 type receptor mediated signaling
ENSG00000215845	5HT2 type receptor mediated signaling
ENSG00000219545	5HT2 type receptor mediated signaling
ENSG00000224470	5HT2 type receptor mediated signaling
ENSG00000235750	5HT2 type receptor mediated signaling
ENSG00000249915	5HT2 type receptor mediated signaling
ENSG00000253313	5HT2 type receptor mediated signaling
ENSG00000254986	5HT2 type receptor mediated signaling
ENSG00000260027	5HT2 type receptor mediated signaling
ENSG00000263155	5HT2 type receptor mediated signaling
ENSG00000272398	5HT2 type receptor mediated signaling
ENSG00000273749	5HT2 type receptor mediated signaling
ENSG00000275464	5HT2 type receptor mediated signaling
ENSG00000009830	antiquewhite2
ENSG00000019485	antiquewhite2
ENSG00000031003	antiquewhite2
ENSG00000054392	antiquewhite2
ENSG00000062716	antiquewhite2
ENSG00000078487	antiquewhite2
ENSG00000085231	antiquewhite2
ENSG00000100865	antiquewhite2
ENSG00000101849	antiquewhite2
ENSG00000104529	antiquewhite2
ENSG00000105705	antiquewhite2
ENSG00000111231	antiquewhite2
ENSG00000111886	antiquewhite2
ENSG00000112584	antiquewhite2
ENSG00000112983	antiquewhite2
ENSG00000113240	antiquewhite2
ENSG00000113649	antiquewhite2
ENSG00000115661	antiquewhite2
ENSG00000119684	antiquewhite2
ENSG00000120727	antiquewhite2
ENSG00000125812	antiquewhite2
ENSG00000125814	antiquewhite2
ENSG00000129197	antiquewhite2
ENSG00000129292	antiquewhite2
ENSG00000131469	antiquewhite2
ENSG00000132330	antiquewhite2
ENSG00000133740	antiquewhite2
ENSG00000138381	antiquewhite2
ENSG00000139546	antiquewhite2
ENSG00000140543	antiquewhite2
ENSG00000141540	antiquewhite2
ENSG00000148950	antiquewhite2
ENSG00000156467	antiquewhite2
ENSG00000160284	antiquewhite2
ENSG00000166503	antiquewhite2
ENSG00000167840	antiquewhite2
ENSG00000169045	antiquewhite2
ENSG00000170946	antiquewhite2
ENSG00000172262	antiquewhite2
ENSG00000172748	antiquewhite2
ENSG00000181264	antiquewhite2
ENSG00000185272	antiquewhite2
ENSG00000196557	antiquewhite2
ENSG00000203667	antiquewhite2
ENSG00000205544	antiquewhite2
ENSG00000214941	antiquewhite2
ENSG00000217128	antiquewhite2
ENSG00000229833	antiquewhite2
ENSG00000255302	antiquewhite2
ENSG00000261236	antiquewhite2
ENSG00000263809	antiquewhite2
ENSG00000015153	antiquewhite4
ENSG00000028116	antiquewhite4
ENSG00000035687	antiquewhite4
ENSG00000047315	antiquewhite4
ENSG00000053372	antiquewhite4
ENSG00000056097	antiquewhite4
ENSG00000056277	antiquewhite4
ENSG00000057663	antiquewhite4
ENSG00000065559	antiquewhite4
ENSG00000065615	antiquewhite4
ENSG00000068784	antiquewhite4
ENSG00000079246	antiquewhite4
ENSG00000080345	antiquewhite4
ENSG00000082153	antiquewhite4
ENSG00000085415	antiquewhite4
ENSG00000085760	antiquewhite4
ENSG00000088205	antiquewhite4
ENSG00000088766	antiquewhite4
ENSG00000089195	antiquewhite4
ENSG00000092853	antiquewhite4
ENSG00000096401	antiquewhite4
ENSG00000100335	antiquewhite4
ENSG00000100906	antiquewhite4
ENSG00000101596	antiquewhite4
ENSG00000101972	antiquewhite4
ENSG00000102390	antiquewhite4
ENSG00000103707	antiquewhite4
ENSG00000104824	antiquewhite4
ENSG00000108561	antiquewhite4
ENSG00000109320	antiquewhite4
ENSG00000111358	antiquewhite4
ENSG00000112031	antiquewhite4
ENSG00000112308	antiquewhite4
ENSG00000112312	antiquewhite4
ENSG00000115053	antiquewhite4
ENSG00000115233	antiquewhite4
ENSG00000115484	antiquewhite4
ENSG00000115761	antiquewhite4
ENSG00000115946	antiquewhite4
ENSG00000116120	antiquewhite4
ENSG00000117118	antiquewhite4
ENSG00000117133	antiquewhite4
ENSG00000117614	antiquewhite4
ENSG00000120438	antiquewhite4
ENSG00000120948	antiquewhite4
ENSG00000123505	antiquewhite4
ENSG00000125351	antiquewhite4
ENSG00000125352	antiquewhite4
ENSG00000128050	antiquewhite4
ENSG00000128059	antiquewhite4
ENSG00000131023	antiquewhite4
ENSG00000131269	antiquewhite4
ENSG00000131504	antiquewhite4
ENSG00000132603	antiquewhite4
ENSG00000132670	antiquewhite4
ENSG00000132842	antiquewhite4
ENSG00000135316	antiquewhite4
ENSG00000135334	antiquewhite4
ENSG00000135336	antiquewhite4
ENSG00000135521	antiquewhite4
ENSG00000135999	antiquewhite4
ENSG00000136933	antiquewhite4
ENSG00000138750	antiquewhite4
ENSG00000143942	antiquewhite4
ENSG00000144354	antiquewhite4
ENSG00000145247	antiquewhite4
ENSG00000145996	antiquewhite4
ENSG00000146263	antiquewhite4
ENSG00000146457	antiquewhite4
ENSG00000147140	antiquewhite4
ENSG00000152683	antiquewhite4
ENSG00000155827	antiquewhite4
ENSG00000156374	antiquewhite4
ENSG00000156697	antiquewhite4
ENSG00000158417	antiquewhite4
ENSG00000163510	antiquewhite4
ENSG00000163811	antiquewhite4
ENSG00000165060	antiquewhite4
ENSG00000165480	antiquewhite4
ENSG00000165490	antiquewhite4
ENSG00000165997	antiquewhite4
ENSG00000167193	antiquewhite4
ENSG00000169410	antiquewhite4
ENSG00000170144	antiquewhite4
ENSG00000171988	antiquewhite4
ENSG00000173614	antiquewhite4
ENSG00000173692	antiquewhite4
ENSG00000174780	antiquewhite4
ENSG00000178409	antiquewhite4
ENSG00000196290	antiquewhite4
ENSG00000196591	antiquewhite4
ENSG00000197498	antiquewhite4
ENSG00000205426	antiquewhite4
ENSG00000006377	ARNT KO
ENSG00000043355	ARNT KO
ENSG00000057657	ARNT KO
ENSG00000074590	ARNT KO
ENSG00000076706	ARNT KO
ENSG00000079819	ARNT KO
ENSG00000081087	ARNT KO
ENSG00000091542	ARNT KO
ENSG00000100600	ARNT KO
ENSG00000104219	ARNT KO
ENSG00000105880	ARNT KO
ENSG00000107551	ARNT KO
ENSG00000111843	ARNT KO
ENSG00000112276	ARNT KO
ENSG00000115232	ARNT KO
ENSG00000115421	ARNT KO
ENSG00000115935	ARNT KO
ENSG00000120526	ARNT KO
ENSG00000125430	ARNT KO
ENSG00000125657	ARNT KO
ENSG00000128203	ARNT KO
ENSG00000129195	ARNT KO
ENSG00000131899	ARNT KO
ENSG00000133069	ARNT KO
ENSG00000134070	ARNT KO
ENSG00000135338	ARNT KO
ENSG00000135916	ARNT KO
ENSG00000137142	ARNT KO
ENSG00000137801	ARNT KO
ENSG00000139292	ARNT KO
ENSG00000145050	ARNT KO
ENSG00000145569	ARNT KO
ENSG00000146426	ARNT KO
ENSG00000151917	ARNT KO
ENSG00000152495	ARNT KO
ENSG00000155304	ARNT KO
ENSG00000159128	ARNT KO
ENSG00000165512	ARNT KO
ENSG00000165996	ARNT KO
ENSG00000166313	ARNT KO
ENSG00000166340	ARNT KO
ENSG00000166949	ARNT KO
ENSG00000167191	ARNT KO
ENSG00000168502	ARNT KO
ENSG00000168685	ARNT KO
ENSG00000169379	ARNT KO
ENSG00000169621	ARNT KO
ENSG00000171451	ARNT KO
ENSG00000172159	ARNT KO
ENSG00000172986	ARNT KO
ENSG00000176170	ARNT KO
ENSG00000179855	ARNT KO
ENSG00000180340	ARNT KO
ENSG00000181104	ARNT KO
ENSG00000182253	ARNT KO
ENSG00000182963	ARNT KO
ENSG00000183255	ARNT KO
ENSG00000184009	ARNT KO
ENSG00000188343	ARNT KO
ENSG00000188452	ARNT KO
ENSG00000196284	ARNT KO
ENSG00000196588	ARNT KO
ENSG00000196628	ARNT KO
ENSG00000198846	ARNT KO
ENSG00000241839	ARNT KO
ENSG00000259024	ARNT KO
ENSG00000003989	ARRDC3-AS1
ENSG00000006194	ARRDC3-AS1
ENSG00000007306	ARRDC3-AS1
ENSG00000013573	ARRDC3-AS1
ENSG00000023839	ARRDC3-AS1
ENSG00000047230	ARRDC3-AS1
ENSG00000058335	ARRDC3-AS1
ENSG00000065518	ARRDC3-AS1
ENSG00000065911	ARRDC3-AS1
ENSG00000078043	ARRDC3-AS1
ENSG00000079134	ARRDC3-AS1
ENSG00000080854	ARRDC3-AS1
ENSG00000082196	ARRDC3-AS1
ENSG00000085733	ARRDC3-AS1
ENSG00000085978	ARRDC3-AS1
ENSG00000085982	ARRDC3-AS1
ENSG00000087470	ARRDC3-AS1
ENSG00000089022	ARRDC3-AS1
ENSG00000093072	ARRDC3-AS1
ENSG00000099338	ARRDC3-AS1
ENSG00000099910	ARRDC3-AS1
ENSG00000100033	ARRDC3-AS1
ENSG00000101751	ARRDC3-AS1
ENSG00000102387	ARRDC3-AS1
ENSG00000102796	ARRDC3-AS1
ENSG00000104064	ARRDC3-AS1
ENSG00000104290	ARRDC3-AS1
ENSG00000105136	ARRDC3-AS1
ENSG00000105708	ARRDC3-AS1
ENSG00000105737	ARRDC3-AS1
ENSG00000106018	ARRDC3-AS1
ENSG00000106927	ARRDC3-AS1
ENSG00000107242	ARRDC3-AS1
ENSG00000107672	ARRDC3-AS1
ENSG00000107854	ARRDC3-AS1
ENSG00000108061	ARRDC3-AS1
ENSG00000109163	ARRDC3-AS1
ENSG00000110075	ARRDC3-AS1
ENSG00000110484	ARRDC3-AS1
ENSG00000110925	ARRDC3-AS1
ENSG00000111224	ARRDC3-AS1
ENSG00000111229	ARRDC3-AS1
ENSG00000111254	ARRDC3-AS1
ENSG00000111647	ARRDC3-AS1
ENSG00000112562	ARRDC3-AS1
ENSG00000113924	ARRDC3-AS1
ENSG00000114933	ARRDC3-AS1
ENSG00000115109	ARRDC3-AS1
ENSG00000115687	ARRDC3-AS1
ENSG00000115705	ARRDC3-AS1
ENSG00000115738	ARRDC3-AS1
ENSG00000117009	ARRDC3-AS1
ENSG00000117139	ARRDC3-AS1
ENSG00000120370	ARRDC3-AS1
ENSG00000120686	ARRDC3-AS1
ENSG00000123358	ARRDC3-AS1
ENSG00000123552	ARRDC3-AS1
ENSG00000124334	ARRDC3-AS1
ENSG00000124935	ARRDC3-AS1
ENSG00000124939	ARRDC3-AS1
ENSG00000125823	ARRDC3-AS1
ENSG00000127540	ARRDC3-AS1
ENSG00000128309	ARRDC3-AS1
ENSG00000130054	ARRDC3-AS1
ENSG00000130222	ARRDC3-AS1
ENSG00000131626	ARRDC3-AS1
ENSG00000132141	ARRDC3-AS1
ENSG00000132952	ARRDC3-AS1
ENSG00000133103	ARRDC3-AS1
ENSG00000135773	ARRDC3-AS1
ENSG00000136098	ARRDC3-AS1
ENSG00000138379	ARRDC3-AS1
ENSG00000139182	ARRDC3-AS1
ENSG00000139187	ARRDC3-AS1
ENSG00000139668	ARRDC3-AS1
ENSG00000139910	ARRDC3-AS1
ENSG00000140650	ARRDC3-AS1
ENSG00000141627	ARRDC3-AS1
ENSG00000141665	ARRDC3-AS1
ENSG00000144233	ARRDC3-AS1
ENSG00000144840	ARRDC3-AS1
ENSG00000145416	ARRDC3-AS1
ENSG00000146013	ARRDC3-AS1
ENSG00000146267	ARRDC3-AS1
ENSG00000146587	ARRDC3-AS1
ENSG00000151117	ARRDC3-AS1
ENSG00000152705	ARRDC3-AS1
ENSG00000152942	ARRDC3-AS1
ENSG00000153767	ARRDC3-AS1
ENSG00000154252	ARRDC3-AS1
ENSG00000154359	ARRDC3-AS1
ENSG00000154889	ARRDC3-AS1
ENSG00000157106	ARRDC3-AS1
ENSG00000159388	ARRDC3-AS1
ENSG00000159714	ARRDC3-AS1
ENSG00000159882	ARRDC3-AS1
ENSG00000159885	ARRDC3-AS1
ENSG00000162817	ARRDC3-AS1
ENSG00000163072	ARRDC3-AS1
ENSG00000163126	ARRDC3-AS1
ENSG00000164074	ARRDC3-AS1
ENSG00000164199	ARRDC3-AS1
ENSG00000164631	ARRDC3-AS1
ENSG00000165521	ARRDC3-AS1
ENSG00000166483	ARRDC3-AS1
ENSG00000166532	ARRDC3-AS1
ENSG00000168228	ARRDC3-AS1
ENSG00000168234	ARRDC3-AS1
ENSG00000168556	ARRDC3-AS1
ENSG00000168872	ARRDC3-AS1
ENSG00000169282	ARRDC3-AS1
ENSG00000170113	ARRDC3-AS1
ENSG00000170873	ARRDC3-AS1
ENSG00000171428	ARRDC3-AS1
ENSG00000171722	ARRDC3-AS1
ENSG00000171791	ARRDC3-AS1
ENSG00000171862	ARRDC3-AS1
ENSG00000172058	ARRDC3-AS1
ENSG00000172531	ARRDC3-AS1
ENSG00000172590	ARRDC3-AS1
ENSG00000172789	ARRDC3-AS1
ENSG00000173226	ARRDC3-AS1
ENSG00000173681	ARRDC3-AS1
ENSG00000173930	ARRDC3-AS1
ENSG00000175003	ARRDC3-AS1
ENSG00000175497	ARRDC3-AS1
ENSG00000175634	ARRDC3-AS1
ENSG00000176182	ARRDC3-AS1
ENSG00000176472	ARRDC3-AS1
ENSG00000176714	ARRDC3-AS1
ENSG00000177191	ARRDC3-AS1
ENSG00000177398	ARRDC3-AS1
ENSG00000177576	ARRDC3-AS1
ENSG00000178026	ARRDC3-AS1
ENSG00000178229	ARRDC3-AS1
ENSG00000178397	ARRDC3-AS1
ENSG00000179399	ARRDC3-AS1
ENSG00000180806	ARRDC3-AS1
ENSG00000180855	ARRDC3-AS1
ENSG00000180953	ARRDC3-AS1
ENSG00000183735	ARRDC3-AS1
ENSG00000184515	ARRDC3-AS1
ENSG00000184708	ARRDC3-AS1
ENSG00000185252	ARRDC3-AS1
ENSG00000185386	ARRDC3-AS1
ENSG00000186104	ARRDC3-AS1
ENSG00000186106	ARRDC3-AS1
ENSG00000186462	ARRDC3-AS1
ENSG00000186814	ARRDC3-AS1
ENSG00000196233	ARRDC3-AS1
ENSG00000197496	ARRDC3-AS1
ENSG00000197563	ARRDC3-AS1
ENSG00000197601	ARRDC3-AS1
ENSG00000197757	ARRDC3-AS1
ENSG00000198077	ARRDC3-AS1
ENSG00000203872	ARRDC3-AS1
ENSG00000204524	ARRDC3-AS1
ENSG00000205707	ARRDC3-AS1
ENSG00000215012	ARRDC3-AS1
ENSG00000231672	ARRDC3-AS1
ENSG00000231887	ARRDC3-AS1
ENSG00000239474	ARRDC3-AS1
ENSG00000241962	ARRDC3-AS1
ENSG00000242866	ARRDC3-AS1
ENSG00000244754	ARRDC3-AS1
ENSG00000248405	ARRDC3-AS1
ENSG00000249961	ARRDC3-AS1
ENSG00000255974	ARRDC3-AS1
ENSG00000256537	ARRDC3-AS1
ENSG00000260428	ARRDC3-AS1
ENSG00000265681	ARRDC3-AS1
ENSG00000267680	ARRDC3-AS1
ENSG00000268533	ARRDC3-AS1
ENSG00000269858	ARRDC3-AS1
ENSG00000270168	ARRDC3-AS1
ENSG00000274874	ARRDC3-AS1
ENSG00000008405	bisque4
ENSG00000014914	bisque4
ENSG00000059378	bisque4
ENSG00000064666	bisque4
ENSG00000066322	bisque4
ENSG00000075391	bisque4
ENSG00000075711	bisque4
ENSG00000081041	bisque4
ENSG00000088832	bisque4
ENSG00000097021	bisque4
ENSG00000100342	bisque4
ENSG00000100439	bisque4
ENSG00000102034	bisque4
ENSG00000103005	bisque4
ENSG00000103187	bisque4
ENSG00000105997	bisque4
ENSG00000106615	bisque4
ENSG00000107130	bisque4
ENSG00000107338	bisque4
ENSG00000107738	bisque4
ENSG00000109854	bisque4
ENSG00000110395	bisque4
ENSG00000112343	bisque4
ENSG00000112561	bisque4
ENSG00000112655	bisque4
ENSG00000114126	bisque4
ENSG00000114446	bisque4
ENSG00000117226	bisque4
ENSG00000117228	bisque4
ENSG00000117395	bisque4
ENSG00000117399	bisque4
ENSG00000117419	bisque4
ENSG00000119917	bisque4
ENSG00000119922	bisque4
ENSG00000124299	bisque4
ENSG00000125347	bisque4
ENSG00000126705	bisque4
ENSG00000128284	bisque4
ENSG00000129250	bisque4
ENSG00000132170	bisque4
ENSG00000133216	bisque4
ENSG00000133321	bisque4
ENSG00000134107	bisque4
ENSG00000134470	bisque4
ENSG00000134531	bisque4
ENSG00000135069	bisque4
ENSG00000135083	bisque4
ENSG00000135114	bisque4
ENSG00000135636	bisque4
ENSG00000136205	bisque4
ENSG00000137312	bisque4
ENSG00000137628	bisque4
ENSG00000137656	bisque4
ENSG00000138386	bisque4
ENSG00000138434	bisque4
ENSG00000139112	bisque4
ENSG00000139289	bisque4
ENSG00000140464	bisque4
ENSG00000142634	bisque4
ENSG00000142945	bisque4
ENSG00000144730	bisque4
ENSG00000145819	bisque4
ENSG00000146376	bisque4
ENSG00000146410	bisque4
ENSG00000149269	bisque4
ENSG00000153936	bisque4
ENSG00000155090	bisque4
ENSG00000155324	bisque4
ENSG00000156463	bisque4
ENSG00000156587	bisque4
ENSG00000157557	bisque4
ENSG00000158220	bisque4
ENSG00000158470	bisque4
ENSG00000162236	bisque4
ENSG00000162607	bisque4
ENSG00000163818	bisque4
ENSG00000163935	bisque4
ENSG00000163975	bisque4
ENSG00000168016	bisque4
ENSG00000168394	bisque4
ENSG00000169129	bisque4
ENSG00000169247	bisque4
ENSG00000169679	bisque4
ENSG00000171150	bisque4
ENSG00000171793	bisque4
ENSG00000172137	bisque4
ENSG00000173557	bisque4
ENSG00000175832	bisque4
ENSG00000177119	bisque4
ENSG00000179029	bisque4
ENSG00000179262	bisque4
ENSG00000181191	bisque4
ENSG00000181381	bisque4
ENSG00000185215	bisque4
ENSG00000185361	bisque4
ENSG00000185745	bisque4
ENSG00000187676	bisque4
ENSG00000197142	bisque4
ENSG00000197798	bisque4
ENSG00000198689	bisque4
ENSG00000203950	bisque4
ENSG00000204264	bisque4
ENSG00000204267	bisque4
ENSG00000204525	bisque4
ENSG00000213762	bisque4
ENSG00000221963	bisque4
ENSG00000231925	bisque4
ENSG00000237649	bisque4
ENSG00000240065	bisque4
ENSG00000242498	bisque4
ENSG00000243646	bisque4
ENSG00000253276	bisque4
ENSG00000254087	bisque4
ENSG00000002016	black
ENSG00000004534	black
ENSG00000005700	black
ENSG00000006740	black
ENSG00000007392	black
ENSG00000007545	black
ENSG00000008516	black
ENSG00000010539	black
ENSG00000013441	black
ENSG00000015285	black
ENSG00000018189	black
ENSG00000021488	black
ENSG00000042317	black
ENSG00000049768	black
ENSG00000051523	black
ENSG00000053702	black
ENSG00000056558	black
ENSG00000059145	black
ENSG00000063854	black
ENSG00000066739	black
ENSG00000068745	black
ENSG00000074935	black
ENSG00000076344	black
ENSG00000078177	black
ENSG00000078668	black
ENSG00000082258	black
ENSG00000088992	black
ENSG00000089820	black
ENSG00000090382	black
ENSG00000090565	black
ENSG00000090615	black
ENSG00000095464	black
ENSG00000095739	black
ENSG00000099949	black
ENSG00000099991	black
ENSG00000100038	black
ENSG00000100068	black
ENSG00000100209	black
ENSG00000101493	black
ENSG00000101901	black
ENSG00000102001	black
ENSG00000102858	black
ENSG00000103061	black
ENSG00000103202	black
ENSG00000103254	black
ENSG00000103260	black
ENSG00000103490	black
ENSG00000104365	black
ENSG00000104671	black
ENSG00000104859	black
ENSG00000104957	black
ENSG00000105778	black
ENSG00000105982	black
ENSG00000106100	black
ENSG00000106733	black
ENSG00000109771	black
ENSG00000109920	black
ENSG00000110719	black
ENSG00000111203	black
ENSG00000111215	black
ENSG00000111644	black
ENSG00000111653	black
ENSG00000112309	black
ENSG00000114166	black
ENSG00000114654	black
ENSG00000114656	black
ENSG00000114857	black
ENSG00000115425	black
ENSG00000116205	black
ENSG00000116984	black
ENSG00000117640	black
ENSG00000118620	black
ENSG00000119772	black
ENSG00000119965	black
ENSG00000120500	black
ENSG00000121318	black
ENSG00000121440	black
ENSG00000122299	black
ENSG00000123219	black
ENSG00000123570	black
ENSG00000123992	black
ENSG00000124091	black
ENSG00000124257	black
ENSG00000125633	black
ENSG00000125846	black
ENSG00000126231	black
ENSG00000126233	black
ENSG00000128228	black
ENSG00000128731	black
ENSG00000129295	black
ENSG00000129437	black
ENSG00000130005	black
ENSG00000130731	black
ENSG00000130770	black
ENSG00000131152	black
ENSG00000131171	black
ENSG00000131398	black
ENSG00000131400	black
ENSG00000131697	black
ENSG00000131791	black
ENSG00000132199	black
ENSG00000132207	black
ENSG00000132549	black
ENSG00000132613	black
ENSG00000133392	black
ENSG00000133858	black
ENSG00000134480	black
ENSG00000134759	black
ENSG00000135423	black
ENSG00000135976	black
ENSG00000136003	black
ENSG00000136206	black
ENSG00000136279	black
ENSG00000136449	black
ENSG00000136457	black
ENSG00000136874	black
ENSG00000137070	black
ENSG00000137860	black
ENSG00000138036	black
ENSG00000138468	black
ENSG00000138495	black
ENSG00000138613	black
ENSG00000138688	black
ENSG00000139190	black
ENSG00000140319	black
ENSG00000140398	black
ENSG00000140471	black
ENSG00000141424	black
ENSG00000141542	black
ENSG00000143199	black
ENSG00000143398	black
ENSG00000143630	black
ENSG00000143786	black
ENSG00000143793	black
ENSG00000143951	black
ENSG00000144026	black
ENSG00000144395	black
ENSG00000144401	black
ENSG00000144485	black
ENSG00000144566	black
ENSG00000145002	black
ENSG00000145075	black
ENSG00000145214	black
ENSG00000145975	black
ENSG00000147059	black
ENSG00000147421	black
ENSG00000147471	black
ENSG00000147535	black
ENSG00000148057	black
ENSG00000149021	black
ENSG00000149922	black
ENSG00000149926	black
ENSG00000150477	black
ENSG00000151092	black
ENSG00000151229	black
ENSG00000151655	black
ENSG00000151743	black
ENSG00000153037	black
ENSG00000153234	black
ENSG00000153832	black
ENSG00000155744	black
ENSG00000155749	black
ENSG00000157653	black
ENSG00000157778	black
ENSG00000157999	black
ENSG00000159792	black
ENSG00000160953	black
ENSG00000160973	black
ENSG00000162004	black
ENSG00000162244	black
ENSG00000162601	black
ENSG00000162910	black
ENSG00000162924	black
ENSG00000162944	black
ENSG00000162971	black
ENSG00000162976	black
ENSG00000163516	black
ENSG00000163645	black
ENSG00000163660	black
ENSG00000163705	black
ENSG00000163806	black
ENSG00000164125	black
ENSG00000164258	black
ENSG00000164331	black
ENSG00000164442	black
ENSG00000164548	black
ENSG00000164742	black
ENSG00000164776	black
ENSG00000165084	black
ENSG00000165264	black
ENSG00000165533	black
ENSG00000165868	black
ENSG00000166012	black
ENSG00000166266	black
ENSG00000166377	black
ENSG00000166432	black
ENSG00000166676	black
ENSG00000167216	black
ENSG00000167377	black
ENSG00000167380	black
ENSG00000167476	black
ENSG00000167604	black
ENSG00000167971	black
ENSG00000168152	black
ENSG00000168298	black
ENSG00000168306	black
ENSG00000168675	black
ENSG00000169169	black
ENSG00000169203	black
ENSG00000169246	black
ENSG00000169330	black
ENSG00000169635	black
ENSG00000169696	black
ENSG00000169758	black
ENSG00000169885	black
ENSG00000169895	black
ENSG00000169989	black
ENSG00000170917	black
ENSG00000171116	black
ENSG00000171163	black
ENSG00000171217	black
ENSG00000171714	black
ENSG00000172113	black
ENSG00000172318	black
ENSG00000172458	black
ENSG00000172650	black
ENSG00000172663	black
ENSG00000172785	black
ENSG00000172803	black
ENSG00000172932	black
ENSG00000172940	black
ENSG00000173200	black
ENSG00000173272	black
ENSG00000173281	black
ENSG00000173338	black
ENSG00000173401	black
ENSG00000173480	black
ENSG00000173531	black
ENSG00000173575	black
ENSG00000174137	black
ENSG00000174307	black
ENSG00000174527	black
ENSG00000174788	black
ENSG00000174943	black
ENSG00000175324	black
ENSG00000175395	black
ENSG00000175470	black
ENSG00000175482	black
ENSG00000176209	black
ENSG00000176563	black
ENSG00000176809	black
ENSG00000177034	black
ENSG00000177483	black
ENSG00000178386	black
ENSG00000178852	black
ENSG00000179256	black
ENSG00000179532	black
ENSG00000179902	black
ENSG00000180071	black
ENSG00000180481	black
ENSG00000181016	black
ENSG00000182389	black
ENSG00000183426	black
ENSG00000183628	black
ENSG00000183889	black
ENSG00000183971	black
ENSG00000184076	black
ENSG00000184260	black
ENSG00000184436	black
ENSG00000184451	black
ENSG00000184786	black
ENSG00000185088	black
ENSG00000185345	black
ENSG00000185689	black
ENSG00000185818	black
ENSG00000185842	black
ENSG00000185864	black
ENSG00000186376	black
ENSG00000186787	black
ENSG00000186815	black
ENSG00000187010	black
ENSG00000187105	black
ENSG00000187123	black
ENSG00000187695	black
ENSG00000187699	black
ENSG00000188092	black
ENSG00000188234	black
ENSG00000188266	black
ENSG00000188501	black
ENSG00000188542	black
ENSG00000188732	black
ENSG00000188738	black
ENSG00000196131	black
ENSG00000196544	black
ENSG00000196787	black
ENSG00000196873	black
ENSG00000196912	black
ENSG00000197119	black
ENSG00000197620	black
ENSG00000197653	black
ENSG00000197766	black
ENSG00000197978	black
ENSG00000197980	black
ENSG00000198019	black
ENSG00000198353	black
ENSG00000198590	black
ENSG00000198625	black
ENSG00000198682	black
ENSG00000198707	black
ENSG00000198718	black
ENSG00000198799	black
ENSG00000198814	black
ENSG00000203814	black
ENSG00000203867	black
ENSG00000204116	black
ENSG00000204130	black
ENSG00000205085	black
ENSG00000205307	black
ENSG00000205693	black
ENSG00000206127	black
ENSG00000212124	black
ENSG00000213139	black
ENSG00000213145	black
ENSG00000213204	black
ENSG00000213658	black
ENSG00000213901	black
ENSG00000214967	black
ENSG00000215126	black
ENSG00000215252	black
ENSG00000215277	black
ENSG00000215915	black
ENSG00000222046	black
ENSG00000224712	black
ENSG00000224877	black
ENSG00000225805	black
ENSG00000228486	black
ENSG00000229809	black
ENSG00000232593	black
ENSG00000232653	black
ENSG00000233232	black
ENSG00000234465	black
ENSG00000235034	black
ENSG00000235453	black
ENSG00000240230	black
ENSG00000241489	black
ENSG00000241644	black
ENSG00000242612	black
ENSG00000243667	black
ENSG00000243716	black
ENSG00000244274	black
ENSG00000247595	black
ENSG00000254206	black
ENSG00000255423	black
ENSG00000258539	black
ENSG00000258790	black
ENSG00000259066	black
ENSG00000259529	black
ENSG00000260007	black
ENSG00000261732	black
ENSG00000263956	black
ENSG00000264343	black
ENSG00000270617	black
ENSG00000270629	black
ENSG00000271383	black
ENSG00000274386	black
ENSG00000274529	black
ENSG00000278662	black
ENSG00000280537	black
ENSG00000001036	brown
ENSG00000001460	brown
ENSG00000004455	brown
ENSG00000004700	brown
ENSG00000011422	brown
ENSG00000011426	brown
ENSG00000017260	brown
ENSG00000018408	brown
ENSG00000018510	brown
ENSG00000018699	brown
ENSG00000023445	brown
ENSG00000024862	brown
ENSG00000026508	brown
ENSG00000029153	brown
ENSG00000034510	brown
ENSG00000036054	brown
ENSG00000039560	brown
ENSG00000042493	brown
ENSG00000047932	brown
ENSG00000049245	brown
ENSG00000051128	brown
ENSG00000054598	brown
ENSG00000057019	brown
ENSG00000057252	brown
ENSG00000058063	brown
ENSG00000058085	brown
ENSG00000058668	brown
ENSG00000065882	brown
ENSG00000065978	brown
ENSG00000067057	brown
ENSG00000067066	brown
ENSG00000067082	brown
ENSG00000067560	brown
ENSG00000068305	brown
ENSG00000068366	brown
ENSG00000071054	brown
ENSG00000072110	brown
ENSG00000073008	brown
ENSG00000073756	brown
ENSG00000073792	brown
ENSG00000074527	brown
ENSG00000074657	brown
ENSG00000074800	brown
ENSG00000075151	brown
ENSG00000075420	brown
ENSG00000075618	brown
ENSG00000075624	brown
ENSG00000076053	brown
ENSG00000077150	brown
ENSG00000077942	brown
ENSG00000079156	brown
ENSG00000079739	brown
ENSG00000080822	brown
ENSG00000081189	brown
ENSG00000081320	brown
ENSG00000082641	brown
ENSG00000083817	brown
ENSG00000084207	brown
ENSG00000084623	brown
ENSG00000085063	brown
ENSG00000087053	brown
ENSG00000087086	brown
ENSG00000088826	brown
ENSG00000089327	brown
ENSG00000090530	brown
ENSG00000090776	brown
ENSG00000090863	brown
ENSG00000091317	brown
ENSG00000091436	brown
ENSG00000091490	brown
ENSG00000091947	brown
ENSG00000092969	brown
ENSG00000093144	brown
ENSG00000097033	brown
ENSG00000099250	brown
ENSG00000099917	brown
ENSG00000100139	brown
ENSG00000100221	brown
ENSG00000100344	brown
ENSG00000100364	brown
ENSG00000100504	brown
ENSG00000100599	brown
ENSG00000100644	brown
ENSG00000101160	brown
ENSG00000101384	brown
ENSG00000101608	brown
ENSG00000102024	brown
ENSG00000102781	brown
ENSG00000102805	brown
ENSG00000104805	brown
ENSG00000105700	brown
ENSG00000105810	brown
ENSG00000105887	brown
ENSG00000105971	brown
ENSG00000105974	brown
ENSG00000105976	brown
ENSG00000107771	brown
ENSG00000107863	brown
ENSG00000107957	brown
ENSG00000108518	brown
ENSG00000108828	brown
ENSG00000108961	brown
ENSG00000109220	brown
ENSG00000109466	brown
ENSG00000109790	brown
ENSG00000109861	brown
ENSG00000110330	brown
ENSG00000111145	brown
ENSG00000111696	brown
ENSG00000111817	brown
ENSG00000112697	brown
ENSG00000112984	brown
ENSG00000113369	brown
ENSG00000113407	brown
ENSG00000113966	brown
ENSG00000114439	brown
ENSG00000114544	brown
ENSG00000114698	brown
ENSG00000115091	brown
ENSG00000115170	brown
ENSG00000115295	brown
ENSG00000115306	brown
ENSG00000115310	brown
ENSG00000115504	brown
ENSG00000115825	brown
ENSG00000115841	brown
ENSG00000115963	brown
ENSG00000115977	brown
ENSG00000116095	brown
ENSG00000116285	brown
ENSG00000116514	brown
ENSG00000116584	brown
ENSG00000116641	brown
ENSG00000116793	brown
ENSG00000116871	brown
ENSG00000117069	brown
ENSG00000117114	brown
ENSG00000117151	brown
ENSG00000117174	brown
ENSG00000117525	brown
ENSG00000118454	brown
ENSG00000118985	brown
ENSG00000119185	brown
ENSG00000119403	brown
ENSG00000120254	brown
ENSG00000120318	brown
ENSG00000120708	brown
ENSG00000121236	brown
ENSG00000121281	brown
ENSG00000121895	brown
ENSG00000122729	brown
ENSG00000122861	brown
ENSG00000123146	brown
ENSG00000123240	brown
ENSG00000124535	brown
ENSG00000125148	brown
ENSG00000125733	brown
ENSG00000126107	brown
ENSG00000126561	brown
ENSG00000127463	brown
ENSG00000127526	brown
ENSG00000127666	brown
ENSG00000127955	brown
ENSG00000128052	brown
ENSG00000128245	brown
ENSG00000128283	brown
ENSG00000128340	brown
ENSG00000128342	brown
ENSG00000129680	brown
ENSG00000130340	brown
ENSG00000130939	brown
ENSG00000131015	brown
ENSG00000131236	brown
ENSG00000131435	brown
ENSG00000132256	brown
ENSG00000132429	brown
ENSG00000132507	brown
ENSG00000132669	brown
ENSG00000133226	brown
ENSG00000134369	brown
ENSG00000134684	brown
ENSG00000134686	brown
ENSG00000134775	brown
ENSG00000134802	brown
ENSG00000134954	brown
ENSG00000134970	brown
ENSG00000135046	brown
ENSG00000135272	brown
ENSG00000135862	brown
ENSG00000135926	brown
ENSG00000136026	brown
ENSG00000136231	brown
ENSG00000136717	brown
ENSG00000137124	brown
ENSG00000137193	brown
ENSG00000137404	brown
ENSG00000137575	brown
ENSG00000138119	brown
ENSG00000138448	brown
ENSG00000139734	brown
ENSG00000139793	brown
ENSG00000140105	brown
ENSG00000140199	brown
ENSG00000140564	brown
ENSG00000140750	brown
ENSG00000141458	brown
ENSG00000141503	brown
ENSG00000141682	brown
ENSG00000142089	brown
ENSG00000142192	brown
ENSG00000142627	brown
ENSG00000142669	brown
ENSG00000142677	brown
ENSG00000142892	brown
ENSG00000143479	brown
ENSG00000143507	brown
ENSG00000143641	brown
ENSG00000144681	brown
ENSG00000144815	brown
ENSG00000144824	brown
ENSG00000144959	brown
ENSG00000145246	brown
ENSG00000145284	brown
ENSG00000145431	brown
ENSG00000145555	brown
ENSG00000145623	brown
ENSG00000145685	brown
ENSG00000145730	brown
ENSG00000145860	brown
ENSG00000146072	brown
ENSG00000146373	brown
ENSG00000146416	brown
ENSG00000146648	brown
ENSG00000146674	brown
ENSG00000147010	brown
ENSG00000147065	brown
ENSG00000147168	brown
ENSG00000147408	brown
ENSG00000148484	brown
ENSG00000148841	brown
ENSG00000149084	brown
ENSG00000149218	brown
ENSG00000149231	brown
ENSG00000149548	brown
ENSG00000150093	brown
ENSG00000151422	brown
ENSG00000151491	brown
ENSG00000151689	brown
ENSG00000151694	brown
ENSG00000152492	brown
ENSG00000152601	brown
ENSG00000152778	brown
ENSG00000152952	brown
ENSG00000153113	brown
ENSG00000153179	brown
ENSG00000153721	brown
ENSG00000154127	brown
ENSG00000154237	brown
ENSG00000154640	brown
ENSG00000155380	brown
ENSG00000155660	brown
ENSG00000157191	brown
ENSG00000157227	brown
ENSG00000157827	brown
ENSG00000157933	brown
ENSG00000158290	brown
ENSG00000159110	brown
ENSG00000159840	brown
ENSG00000160886	brown
ENSG00000162378	brown
ENSG00000162627	brown
ENSG00000162694	brown
ENSG00000162746	brown
ENSG00000163110	brown
ENSG00000163171	brown
ENSG00000163466	brown
ENSG00000163513	brown
ENSG00000163535	brown
ENSG00000163686	brown
ENSG00000164136	brown
ENSG00000164294	brown
ENSG00000164307	brown
ENSG00000164379	brown
ENSG00000164403	brown
ENSG00000164430	brown
ENSG00000164465	brown
ENSG00000164543	brown
ENSG00000164647	brown
ENSG00000164687	brown
ENSG00000164904	brown
ENSG00000164933	brown
ENSG00000164944	brown
ENSG00000164951	brown
ENSG00000165030	brown
ENSG00000166046	brown
ENSG00000166068	brown
ENSG00000166401	brown
ENSG00000166833	brown
ENSG00000166845	brown
ENSG00000166888	brown
ENSG00000167105	brown
ENSG00000167323	brown
ENSG00000167693	brown
ENSG00000168497	brown
ENSG00000168994	brown
ENSG00000169180	brown
ENSG00000169429	brown
ENSG00000169604	brown
ENSG00000169756	brown
ENSG00000169814	brown
ENSG00000169851	brown
ENSG00000169908	brown
ENSG00000169991	brown
ENSG00000170035	brown
ENSG00000170425	brown
ENSG00000170801	brown
ENSG00000171603	brown
ENSG00000171867	brown
ENSG00000171943	brown
ENSG00000172175	brown
ENSG00000172380	brown
ENSG00000172738	brown
ENSG00000173432	brown
ENSG00000173457	brown
ENSG00000173559	brown
ENSG00000173786	brown
ENSG00000173852	brown
ENSG00000174705	brown
ENSG00000175826	brown
ENSG00000175984	brown
ENSG00000176407	brown
ENSG00000176463	brown
ENSG00000176871	brown
ENSG00000177311	brown
ENSG00000177469	brown
ENSG00000177917	brown
ENSG00000178695	brown
ENSG00000178878	brown
ENSG00000179820	brown
ENSG00000181804	brown
ENSG00000182179	brown
ENSG00000182197	brown
ENSG00000182263	brown
ENSG00000182718	brown
ENSG00000182952	brown
ENSG00000183340	brown
ENSG00000183386	brown
ENSG00000183421	brown
ENSG00000183696	brown
ENSG00000183726	brown
ENSG00000183853	brown
ENSG00000184220	brown
ENSG00000184384	brown
ENSG00000184584	brown
ENSG00000184743	brown
ENSG00000185236	brown
ENSG00000185404	brown
ENSG00000185567	brown
ENSG00000186470	brown
ENSG00000186522	brown
ENSG00000186575	brown
ENSG00000186792	brown
ENSG00000186951	brown
ENSG00000188549	brown
ENSG00000188641	brown
ENSG00000196083	brown
ENSG00000196141	brown
ENSG00000196230	brown
ENSG00000196369	brown
ENSG00000196449	brown
ENSG00000196636	brown
ENSG00000196639	brown
ENSG00000196878	brown
ENSG00000196954	brown
ENSG00000197321	brown
ENSG00000197632	brown
ENSG00000197712	brown
ENSG00000197930	brown
ENSG00000197956	brown
ENSG00000198053	brown
ENSG00000198363	brown
ENSG00000198467	brown
ENSG00000198513	brown
ENSG00000198961	brown
ENSG00000204632	brown
ENSG00000205413	brown
ENSG00000206503	brown
ENSG00000206560	brown
ENSG00000213625	brown
ENSG00000213719	brown
ENSG00000213977	brown
ENSG00000214944	brown
ENSG00000233276	brown
ENSG00000242247	brown
ENSG00000244038	brown
ENSG00000277443	brown
ENSG00000005483	brown2
ENSG00000039650	brown2
ENSG00000067829	brown2
ENSG00000069431	brown2
ENSG00000077157	brown2
ENSG00000090238	brown2
ENSG00000097096	brown2
ENSG00000099326	brown2
ENSG00000099899	brown2
ENSG00000100288	brown2
ENSG00000105443	brown2
ENSG00000105854	brown2
ENSG00000108588	brown2
ENSG00000115274	brown2
ENSG00000116213	brown2
ENSG00000117262	brown2
ENSG00000117616	brown2
ENSG00000119778	brown2
ENSG00000124357	brown2
ENSG00000130827	brown2
ENSG00000133460	brown2
ENSG00000134153	brown2
ENSG00000135185	brown2
ENSG00000135250	brown2
ENSG00000136463	brown2
ENSG00000137154	brown2
ENSG00000140749	brown2
ENSG00000142396	brown2
[truncated: 13,306 more rows]
